# Supplementary material for: Commensal bacteria and essential amino acids control food choice behavior and reproduction
Source: PLoS Biol. 2017 Apr 25;15(4):e2000862. doi: 10.1371/journal.pbio.2000862 (PMC5404834; doi:10.1371/journal.pbio.2000862)
Supplement: S1 Data — (XLSX) [file pbio.2000862.s013.xlsx]

## Sheet: Fig 1
	Panel B
	Dietary treatment	yeast based medium						sucrose medium
	Option 1 in food choice assay	Sucrose						Sucrose
	Option 2 in food choice assay	Yeast						Yeast
		red	red/blue	blue	none	Yeast Preference Index		red	red/blue	blue	none	Yeast Preference Index
		9	4	3	0	-0.375		2	3	6	0	0.363636
		14	2	0	0	-0.875		3	2	11	0	0.5
		5	5	6	0	0.0625		3	6	5	0	0.142857
		6	5	2	0	-0.307692		0	2	14	0	0.875
		9	6	1	0	-0.5		1	5	9	0	0.533333
		6	3	3	0	-0.25		0	6	9	0	0.6
		6	4	6	0	0		1	3	11	0	0.666667
		8	5	2	0	-0.4		2	1	12	0	0.666667
		6	4	3	1	-0.230769		0	1	14	0	0.933333
		5	7	4	0	-0.0625		2	2	9	0	0.538462
		5	8	3	0	-0.125		0	0	16	0	1
		11	2	1	0	-0.714286		3	1	11	0	0.533333
		7	5	4	0	-0.1875		0	2	12	0	0.857143
		6	7	2	0	-0.266667		0	3	12	0	0.8
		8	7	1	0	-0.4375		1	3	12	0	0.6875
		7	6	2	0	-0.333333		2	5	8	0	0.4
		8	5	1	1	-0.5		2	4	9	0	0.466667
		9	3	1	0	-0.615385		2	3	8	0	0.461538
	Panel C
	Dietary treatment	holidic medium						holidic medium - AA						holidic medium - folic acid						holidic medium - metals						holidic medium - nc. ac. & lipids						holidic medium - sterols						holidic medium - vitamins
	Option 1 in food choice assay	Sucrose						Sucrose						Sucrose						Sucrose						Sucrose						Sucrose						Sucrose
	Option 2 in food choice assay	Yeast						Yeast						Yeast						Yeast						Yeast						Yeast						Yeast
		red	red/blue	blue	none	Yeast Preference Index		red	red/blue	blue	none	Yeast Preference Index		red	red/blue	blue	none	Yeast Preference Index		red	red/blue	blue	none	Yeast Preference Index		red	red/blue	blue	none	Yeast Preference Index		red	red/blue	blue	none	Yeast Preference Index		red	red/blue	blue	none	Yeast Preference Index
		5	6	3	0	-0.142857		1	4	11	0	0.625		7	5	1	0	-0.461538		6	7	2	0	-0.266667		3	6	6	0	0.2		9	3	3	0	-0.4		6	5	3	0	-0.214286
		3	7	4	0	0.0714286		0	7	9	0	0.5625		8	3	2	0	-0.461538		3	4	7	0	0.285714		5	8	3	0	-0.125		9	7	0	0	-0.5625		5	8	3	0	-0.125
		7	4	2	0	-0.384615		2	3	10	0	0.533333		8	6	2	0	-0.375		8	5	2	0	-0.4		10	4	2	0	-0.5		8	5	3	0	-0.3125		5	8	3	0	-0.125
		10	3	3	0	-0.4375		0	9	7	0	0.4375		7	7	2	0	-0.3125		6	4	6	0	0		8	5	3	0	-0.3125		10	6	0	0	-0.625		10	3	2	1	-0.533333
		10	0	3	0	-0.538462		2	11	2	0	0		9	4	2	0	-0.466667		7	8	1	0	-0.375		2	7	6	0	0.266667		12	2	2	0	-0.625		6	8	2	0	-0.25
		6	6	4	0	-0.125		0	4	11	0	0.733333		8	5	2	0	-0.4		4	12	0	0	-0.25		4	10	2	0	-0.125		11	5	0	0	-0.6875		9	6	1	0	-0.5
		9	5	1	0	-0.533333		0	3	11	0	0.785714		8	3	3	0	-0.357143		3	5	5	1	0.153846		9	4	1	0	-0.571429		13	2	0	0	-0.866667		7	8	1	0	-0.375
		3	4	7	0	0.285714		0	4	12	0	0.75		7	7	2	0	-0.3125		4	7	4	0	0		7	6	2	1	-0.333333		12	4	0	0	-0.75		3	6	6	0	0.2
		6	8	0	0	-0.428571		2	7	6	0	0.266667		5	10	1	0	-0.25		7	4	4	0	-0.2		10	6	0	0	-0.625		12	4	0	0	-0.75		4	6	4	1	0
		11	5	0	0	-0.6875		1	8	5	0	0.285714		8	8	1	0	-0.411765		7	7	2	0	-0.3125		3	8	5	0	0.125		14	2	0	0	-0.875		3	9	3	0	0
		10	4	1	1	-0.6		0	5	9	0	0.642857		10	4	2	0	-0.5		9	6	0	1	-0.6		10	2	2	2	-0.571429		11	5	0	0	-0.6875		9	5	1	0	-0.533333
		6	8	2	0	-0.25		1	6	9	0	0.5		8	6	1	0	-0.466667		3	6	5	1	0.142857		9	7	0	0	-0.5625		15	1	0	0	-0.9375		9	5	0	0	-0.642857
		12	4	0	0	-0.75		1	8	7	0	0.375		6	10	0	0	-0.375		3	7	6	0	0.1875		7	6	3	0	-0.25		12	4	0	0	-0.75		7	7	2	0	-0.3125
		8	6	2	0	-0.375		0	7	9	0	0.5625		7	4	4	0	-0.2		8	5	2	0	-0.4		7	6	3	0	-0.25		12	4	0	0	-0.75		11	5	0	0	-0.6875
		7	9	0	0	-0.4375		2	5	9	0	0.4375		7	7	0	0	-0.5		8	7	1	0	-0.4375		8	7	2	0	-0.352941		13	3	0	0	-0.8125		7	6	1	0	-0.428571
		9	6	0	0	-0.6		0	3	13	0	0.8125		10	6	0	0	-0.625		13	2	1	0	-0.75		8	7	1	0	-0.4375		11	5	0	0	-0.6875		7	9	0	0	-0.4375
	Panel D
	Dietary treatment	holidic medium						holidic medium - AA						holidic medium						holidic medium - AA
	Option 1 in food choice assay	holidic sucrose medium						holidic sucrose medium						holidic sucrose medium						holidic sucrose medium
	Option 2 in food choice assay	holidic AA medium						holidic AA medium						holidic AA medium - AA						holidic AA medium - AA
		red	red/blue	blue	none	AA Preference Index		red	red/blue	blue	none	AA Preference Index		red	red/blue	blue	none	AA Preference Index		red	red/blue	blue	none	AA Preference Index
		11	0	0	4	-1		8	2	6	0	-0.125		14	1	0	0	-0.933333		15	0	0	0	-1
		16	0	0	0	-1		4	7	4	0	0		16	0	0	0	-1		15	1	0	0	-0.9375
		15	1	0	0	-0.9375		7	4	5	0	-0.125		15	0	0	0	-1		15	0	0	0	-1
		14	1	1	0	-0.8125		11	4	1	0	-0.625		13	2	0	0	-0.866667		14	1	0	0	-0.933333
		15	0	0	0	-1		2	8	4	1	0.142857		16	0	0	0	-1		16	0	0	0	-1
		16	0	0	0	-1		7	4	4	0	-0.2		16	0	0	0	-1		16	0	0	0	-1
		13	2	0	0	-0.866667		4	4	6	0	0.142857		14	0	0	0	-1		15	0	0	0	-1
		16	0	0	0	-1		3	9	5	0	0.117647		16	0	0	0	-1		15	0	0	0	-1
		16	1	0	0	-0.941176		4	5	7	0	0.1875		14	0	0	0	-1		16	0	0	0	-1
		13	2	0	0	-0.866667		6	7	4	0	-0.117647		16	0	0	0	-1		15	0	0	0	-1
		15	0	0	0	-1		4	7	3	0	-0.0714286		16	0	0	0	-1		15	1	0	0	-0.9375
		14	0	0	0	-1		5	7	3	0	-0.133333		15	1	0	0	-0.9375		15	0	0	0	-1
	Panel E
	Dietary treatment	holidic medium						holidic medium - all AAs						holidic medium - non-essential AAs						holidic medium - essential AAs
	Option 1 in food choice assay	Sucrose						Sucrose						Sucrose						Sucrose
	Option 2 in food choice assay	Yeast						Yeast						Yeast						Yeast
		red	red/blue	blue	none	Yeast Preference Index		red	red/blue	blue	none	Yeast Preference Index		red	red/blue	blue	none	Yeast Preference Index		red	red/blue	blue	none	Yeast Preference Index
		9	4	2	0	-0.466667		0	3	13	0	0.8125		7	6	1	1	-0.428571		2	0	14	0	0.75
		10	4	2	0	-0.5		1	1	11	0	0.769231		8	6	2	0	-0.375		0	5	9	1	0.642857
		10	5	1	0	-0.5625		4	1	11	0	0.4375		8	4	4	0	-0.25		1	2	11	0	0.714286
		10	4	3	0	-0.411765		0	4	11	0	0.733333		8	5	1	0	-0.5		4	3	8	0	0.266667
		11	4	0	1	-0.733333		2	3	11	0	0.5625		4	8	3	1	-0.0666667		2	1	11	1	0.642857
		9	2	2	1	-0.538462		3	3	10	0	0.4375		8	3	4	0	-0.266667		3	2	10	0	0.466667
		10	3	1	0	-0.642857		2	3	11	0	0.5625		3	7	4	0	0.0714286		3	5	5	3	0.153846
		8	3	0	1	-0.727273		4	3	9	0	0.3125		9	4	2	0	-0.466667		1	4	8	2	0.538462
		10	4	2	0	-0.5		2	2	10	0	0.571429		7	6	3	0	-0.25		5	0	11	0	0.375
		13	1	1	0	-0.8		0	3	10	1	0.769231		11	1	3	0	-0.533333		2	5	8	1	0.4
		10	5	1	0	-0.5625		3	5	7	0	0.266667		8	3	4	0	-0.266667		3	5	7	1	0.266667
		10	1	1	0	-0.75		1	6	7	0	0.428571		10	1	2	0	-0.615385		2	3	8	1	0.461538
	Panel F
	Dietary treatment	holidic medium						holidic medium - all AAs						holidic medium - non-essential AAs						holidic medium - essential AAs
	Option 1 in food choice assay	holidic sucrose medium						holidic sucrose medium						holidic sucrose medium						holidic sucrose medium
	Option 2 in food choice assay	holidic AA medium						holidic AA medium						holidic AA medium						holidic AA medium
		red	red/blue	blue	none	AA Preference Index		red	red/blue	blue	none	AA Preference Index		red	red/blue	blue	none	AA Preference Index		red	red/blue	blue	none	AA Preference Index
		9	6	1	0	-0.5		3	3	10	0	0.4375		1	7	6	2	0.357143		3	9	3	0	0
		8	7	1	0	-0.4375		1	5	10	0	0.5625		10	3	0	0	-0.769231		3	8	5	0	0.125
		10	5	1	0	-0.5625		2	5	6	0	0.307692		11	3	1	0	-0.666667		2	4	8	0	0.428571
		11	5	0	0	-0.6875		5	5	5	0	0		6	4	6	0	0		6	7	2	0	-0.266667
		11	4	0	1	-0.733333		0	8	7	0	0.466667		3	9	3	0	0		6	4	3	3	-0.230769
		3	8	4	0	0.0666667		1	2	12	0	0.733333		11	3	0	0	-0.785714		7	7	2	0	-0.3125
		2	11	2	3	0		0	4	9	0	0.692308		7	7	2	0	-0.3125		1	5	11	0	0.588235
		7	5	4	0	-0.1875		5	5	6	0	0.0625		0	4	11	1	0.733333		7	2	2	4	-0.454545
		9	4	1	0	-0.571429		1	7	7	1	0.4		9	3	3	0	-0.4		0	4	10	2	0.714286
		17	0	0	0	-1		0	7	9	0	0.5625		15	1	0	0	-0.9375		2	9	3	1	0.0714286
		5	10	0	0	-0.333333		2	3	11	0	0.5625		8	5	0	1	-0.615385		1	6	8	0	0.466667
		13	3	0	0	-0.8125		5	4	6	0	0.0666667		4	9	3	0	-0.0625		0	11	5	0	0.3125
		15	1	0	0	-0.9375		2	8	4	0	0.142857		7	6	1	1	-0.428571		2	6	8	0	0.375
		9	6	0	1	-0.6		2	3	8	0	0.461538		10	3	2	0	-0.533333		2	4	6	4	0.333333
		3	5	7	1	0.266667		0	4	11	0	0.733333		4	6	6	0	0.125		2	2	8	2	0.5
		8	7	1	0	-0.4375		0	6	10	0	0.625		13	3	1	0	-0.705882		1	5	7	2	0.461538

## Sheet: Fig 2
	Panel A
	Dietary treatment	holidic medium						holidic medium - all AAs						holidic medium - non-essential AAs						holidic medium - non-essential AAs - Trp						holidic medium - non-essential AAs - Met						holidic medium - non-essential AAs - Arg						holidic medium - non-essential AAs - Phe						holidic medium - non-essential AAs - Lys
	Option 1 in food choice assay	Sucrose						Sucrose						Sucrose						Sucrose						Sucrose						Sucrose						Sucrose						Sucrose
	Option 2 in food choice assay	Yeast						Yeast						Yeast						Yeast						Yeast						Yeast						Yeast						Yeast
		red	red/blue	blue	none	Yeast Preference Index		red	red/blue	blue	none	Yeast Preference Index		red	red/blue	blue	none	Yeast Preference Index		red	red/blue	blue	none	Yeast Preference Index		red	red/blue	blue	none	Yeast Preference Index		red	red/blue	blue	none	Yeast Preference Index		red	red/blue	blue	none	Yeast Preference Index		red	red/blue	blue	none	Yeast Preference Index
		13	3	0	0	-0.8125		1	4	11	0	0.625		13	1	1	0	-0.8		1	4	10	0	0.6		3	3	9	0	0.4		3	3	9	0	0.4		5	7	4	0	-0.0625		5	4	7	0	0.125
		8	3	5	0	-0.1875		2	4	10	0	0.5		12	5	0	0	-0.705882		5	3	8	0	0.1875		8	4	3	0	-0.333333		3	5	8	0	0.3125		2	7	6	1	0.266667		3	5	8	0	0.3125
		11	4	1	0	-0.625		2	7	7	0	0.3125		10	5	0	0	-0.666667		1	5	8	1	0.5		5	6	2	0	-0.230769		5	6	4	0	-0.0666667		4	6	5	0	0.0666667		5	6	4	1	-0.0666667
		8	8	0	0	-0.5		2	5	9	0	0.4375		11	3	0	0	-0.785714		8	4	1	0	-0.538462		4	6	5	0	0.0666667		3	5	7	0	0.266667		4	7	5	0	0.0625		8	4	3	0	-0.333333
		10	4	1	0	-0.6		3	8	5	0	0.125		10	2	3	0	-0.466667		3	7	5	0	0.133333		0	2	13	0	0.866667		1	5	11	0	0.588235		4	4	8	0	0.25		2	5	9	0	0.4375
		11	6	2	0	-0.473684		2	7	7	0	0.3125		10	4	1	0	-0.6		2	5	10	0	0.470588		0	5	11	0	0.6875		3	1	12	0	0.5625		1	4	11	0	0.625		1	1	14	0	0.8125
		5	6	3	1	-0.142857		3	6	7	0	0.25		5	7	4	0	-0.0625		1	5	10	0	0.5625		1	1	14	0	0.8125		1	0	15	0	0.875		2	6	7	0	0.333333		3	3	10	0	0.4375
		9	5	0	1	-0.642857		1	5	10	0	0.5625		11	4	0	0	-0.733333		0	5	11	0	0.6875		4	3	9	0	0.3125		1	0	15	0	0.875		0	5	11	0	0.6875		0	2	14	0	0.875
		12	2	1	0	-0.733333		0	4	12	0	0.75		12	3	1	0	-0.6875		1	5	8	1	0.5		2	4	10	0	0.5		0	4	12	0	0.75		1	3	11	0	0.666667		2	4	8	0	0.428571
		12	2	0	2	-0.857143		0	3	13	0	0.8125		7	5	1	0	-0.461538		1	1	13	0	0.8		0	6	10	0	0.625		0	3	13	0	0.8125		8	4	4	0	-0.25		0	1	14	0	0.933333
		12	3	0	0	-0.8		0	4	11	0	0.733333		9	2	2	0	-0.538462		1	3	11	0	0.666667		3	3	11	0	0.470588		0	4	11	0	0.733333		0	6	10	0	0.625		0	5	8	0	0.615385
		15	0	0	0	-1		0	4	11	1	0.733333		9	3	2	2	-0.5		1	5	10	0	0.5625		4	7	4	0	0		0	3	12	0	0.8		3	4	7	0	0.285714		0	2	14	0	0.875
		10	5	2	0	-0.470588		1	4	10	1	0.6		7	6	3	0	-0.25		0	6	7	0	0.538462		2	5	9	0	0.4375		2	2	12	0	0.625		2	8	5	0	0.2		3	4	9	0	0.375
		10	3	2	1	-0.533333		3	1	10	0	0.5		11	5	0	0	-0.6875		8	4	4	0	-0.25		6	4	7	0	0.0588235		3	1	8	0	0.416667		1	11	5	0	0.235294		1	6	7	0	0.428571
		11	2	2	0	-0.6		4	3	8	0	0.266667		7	4	2	0	-0.384615		4	7	5	0	0.0625		5	6	4	0	-0.0666667		1	5	8	0	0.5		5	3	8	0	0.1875		2	5	6	0	0.307692
		3	3	2	1	-0.125		3	4	8	0	0.333333		6	7	1	0	-0.357143		5	8	2	0	-0.2		3	5	7	0	0.266667		2	4	7	0	0.384615		3	5	7	0	0.266667		6	7	2	0	-0.266667
		7	5	3	0	-0.266667		1	2	9	1	0.666667		12	4	0	0	-0.75		5	5	6	0	0.0625		1	4	9	0	0.571429		4	5	7	0	0.1875		3	6	5	0	0.142857		9	3	4	0	-0.3125
		8	2	3	0	-0.384615		5	3	7	0	0.133333		13	3	0	0	-0.8125		2	6	7	1	0.333333		3	4	6	0	0.230769		1	8	7	0	0.375		2	2	10	0	0.571429		3	11	2	0	-0.0625
		11	5	0	0	-0.6875		3	4	5	0	0.166667		12	2	1	0	-0.733333		2	3	7	1	0.416667		1	5	9	0	0.533333		0	6	9	0	0.6		1	7	8	0	0.4375		7	5	4	0	-0.1875
		11	2	1	1	-0.714286		2	4	6	1	0.333333		7	7	1	0	-0.4		5	6	4	0	-0.0666667		1	10	4	0	0.2		3	3	9	0	0.4		2	11	3	0	0.0625		2	7	5	0	0.214286
		8	3	2	0	-0.461538		4	4	5	0	0.0769231		10	3	2	0	-0.533333		4	7	4	0	0		2	6	8	0	0.375		1	6	9	0	0.5		3	6	7	0	0.25		4	2	10	0	0.375
		10	3	2	0	-0.533333		0	6	7	0	0.538462		9	5	2	0	-0.4375		2	5	7	0	0.357143		3	2	9	0	0.428571		1	5	10	0	0.5625		3	6	4	0	0.0769231		1	7	6	0	0.357143
		13	2	1	0	-0.75		2	5	6	0	0.307692		11	3	1	0	-0.666667		3	8	4	0	0.0666667		7	4	4	0	-0.2		2	5	9	0	0.4375		1	10	6	0	0.294118		5	8	2	0	-0.2
		10	4	1	0	-0.6		6	3	6	0	0		10	4	1	0	-0.6		4	6	3	0	-0.0769231		5	5	6	0	0.0625		4	8	4	0	0		9	4	3	0	-0.375		4	6	5	0	0.0666667
		9	5	0	0	-0.642857		0	2	12	0	0.857143		10	4	0	0	-0.714286		1	7	8	0	0.4375		2	5	9	0	0.4375		2	6	7	0	0.333333		3	9	2	0	-0.0714286		4	6	4	0	0
		10	3	0	0	-0.769231		2	6	7	0	0.333333		5	4	3	0	-0.166667		4	3	6	0	0.153846		2	5	7	0	0.357143		3	7	6	0	0.1875		6	6	4	0	-0.125		1	9	6		0.3125
	Panel B
		Consumption of 10% yeast extract (ml)						Consumption of 20 mM sucrose (ml)
	Dietary treatment	holidic medium					Dietary treatment	holidic medium
	Timepoint	0 hours	1 hour	3 hours	4 hours		Timepoint	0 hours	1 hour	3 hours	4 hours
		0	0.0441177	0.0882353	0.111765			0	0.0361111	0.361111	0.497222
		0	0.025	0.0694445	0.0805556			0	0.0555556	0.302778	0.394444
		0	0	0	0.0166667			0	0.155882	0.5	0.611765
		0	0.0138889	0.0666667	0.0888889			0	0.15	0.477778	0.605556
		0	0	0	0			0	0.0972222	0.383333	0.530555
		0	0	0	0			0	0.191667	0.441667	0.652778
		0	0	0	0			0	0.111765	0.435294	0.5
		0	0	0	0.0111111			0	0.0861111	0.341667	0.447222
		0	0.0194444	0.0472222	0.0694445			0	0.125	0.361111	0.461111
		0	0.00555556	0.0416667	0.0527778			0	0.136111	0.355556	0.363889
	Dietary treatment	- all AAs					Dietary treatment	- all AAs
	Timepoint	0 hours	1 hour	3 hours	4 hours		Timepoint	0 hours	1 hour	3 hours	4 hours
		0	0.138889	0.236111	0.275			0	0.0166667	0.272222	0.341667
		0	0.0722222	0.125	0.135556			0	0.125	0.494444	0.558333
		0	0.0666667	0.1	0.122222			0	0.225	0.391667	0.483333
		0	0.0555556	0.0916667	0.125			0	0.175	0.447222	0.547222
		0	0.0444444	0.0972222	0.113889			0	0.0944444	0.322222	0.422222
		0	0	0.0352941	0.0676471			0	0.123529	0.276471	0.420588
		0	0.0333333	0.0694445	0.0944445			0	0.177778	0.394444	0.477778
		0	0.0222222	0.0972222	0.116667			0	0.144444	0.347222	0.422222
		0	0.102778	0.161111	0.194444			0	0.141667	0.302778	0.394444
		0	6.62274e-09	0.0555556	0.0861111			0	0.166667	0.427778	0.530555
	Dietary treatment	- Arg					Dietary treatment	- Arg
	Timepoint	0 hours	1 hour	3 hours	4 hours		Timepoint	0 hours	1 hour	3 hours	4 hours
		0	0.05	0.108824	0.132353			0	0.0305556	0.425	0.563889
		0	0.0210526	0.0789474	0.1			0	0.134211	0.334211	0.428947
		0	0	0.0305556	0.0777778			0	0.132353	0.294118	0.388235
		0	0	0.05	0.0861111			0	0.158333	0.436111	0.544444
		0	0.0944445	0.147222	0.188889			0	0.0694445	0.286111	0.372222
		0	0	0.0472222	0.0777778			0	0.2	0.375	0.5
		0	0.0111111	0.0777778	0.0861111			0	0.133333	0.341667	0.480556
		0	0	0	0.00277779			0	0.147222	0.408333	0.486111
		0	0.0527778	0.108333	0.138889			0	0.261111	0.586111	0.722222
		0	0.0333333	0.0666667	0.0861111			0	0.122222	0.377778	0.480556
								- Val
	Dietary treatment	- Val					Dietary treatment
	Timepoint	0 hours	1 hour	3 hours	4 hours		Timepoint	0 hours	1 hour	3 hours	4 hours
		0	0.0194444	0.0972222	0.147222			0	0	0.216667	0.322222
		0	0	0.0305555	0.0611111			0	0.227778	0.458333	0.519444
		0	0	0.0194444	0.0361111			0	0.125	0.408333	0.563889
		0	0.0222222	0.0888889	0.116667			0	0.186111	0.355556	0.458333
		0	0.0352941	0.067647	0.0794118			0	0.0823529	0.370588	0.455882
		0	0.00882354	0.0529412	0.0794118			0	0.0764706	0.167647	0.155882
		0	0.0138889	0.0583334	0.105555			0	0.161111	0.433333	0.533333
		0	0.0333333	0.141667	0.172222			0	0.0861111	0.397222	0.511111
		0	0	0.025	0.0555556			0	0.175	0.458333	0.65
		0	0	0.0583333	0.1			0	0.116667	0.347222	0.422222
[truncated: 25 more columns]

## Sheet: Fig 3
	Panel B
	Genotype	tubulin > +						tubulin > +						tubulin > +						tubulin > +						+ > Henna IR1						+ > Henna IR1						+ > Henna IR1						+ > Henna IR1
	Dietary treatment	holidic medium - neAAs						holidic medium - neAAs + 1x Tyr						holidic medium - neAAs + 2x Tyr						holidic medium - all AAs						holidic medium - neAAs						holidic medium - neAAs + 1x Tyr						holidic medium - neAAs + 2x Tyr						holidic medium - all AAs
	Option 1 in food choice assay	Sucrose						Sucrose						Sucrose						Sucrose						Sucrose						Sucrose						Sucrose						Sucrose
	Option 2 in food choice assay	Yeast						Yeast						Yeast						Yeast						Yeast						Yeast						Yeast						Yeast
		red	red/blue	blue	none	Yeast Preference Index		red	red/blue	blue	none	Yeast Preference Index		red	red/blue	blue	none	Yeast Preference Index		red	red/blue	blue	none	Yeast Preference Index		red	red/blue	blue	none	Yeast Preference Index		red	red/blue	blue	none	Yeast Preference Index		red	red/blue	blue	none	Yeast Preference Index		red	red/blue	blue	none	Yeast Preference Index
		12	3	1	0	-0.6875		15	1	0	0	-0.9375		14	1	0	0	-0.933333		3	6	7	0	0.25		7	5	4	0	-0.1875		7	4	3	0	-0.285714		10	4	0	0	-0.714286		2	5	8	0	0.4
		12	3	1	0	-0.6875		13	4	0	0	-0.764706		15	1	0	0	-0.9375		0	6	10	0	0.625		11	5	0	0	-0.6875		12	3	0	0	-0.8		16	0	0	0	-1		0	3	13	0	0.8125
		12	2	1	0	-0.733333		12	4	0	0	-0.75		12	4	0	0	-0.75		0	8	8	0	0.5		10	3	2	0	-0.533333		11	2	0	0	-0.846154		4	4	6	0	0.142857		2	3	10	0	0.533333
		11	5	0	0	-0.6875		15	2	0	0	-0.882353		15	2	0	0	-0.882353		4	8	5	0	0.0588235		9	5	1	0	-0.533333		12	3	1	0	-0.6875		12	2	1	0	-0.733333		3	4	6	0	0.230769
		16	0	0	0	-1		12	3	1	0	-0.6875		14	2	0	0	-0.875		1	4	10	0	0.6		10	5	1	0	-0.5625		8	4	1	1	-0.538462		8	7	1	0	-0.4375		3	10	3	0	0
		14	1	0	0	-0.933333		14	1	0	0	-0.933333		16	0	0	0	-1		0	6	9	0	0.6		9	5	2	0	-0.4375		8	3	3	0	-0.357143		13	2	1	0	-0.75		4	5	6	0	0.133333
		15	2	0	0	-0.882353		11	4	1	0	-0.625		13	3	0	0	-0.8125		1	8	7	0	0.375		9	4	3	0	-0.375		11	2	2	0	-0.6		11	3	2	0	-0.5625		3	6	7	0	0.25
		12	3	0	0	-0.8		14	1	0	0	-0.933333		13	2	1	0	-0.75		0	3	13	0	0.8125		7	7	1	0	-0.4		13	2	1	0	-0.75		13	3	0	0	-0.8125		1	5	10	0	0.5625
		13	3	0	0	-0.8125		13	2	0	0	-0.866667		15	1	0	0	-0.9375		0	9	7	0	0.4375		8	6	1	0	-0.466667		10	5	0	0	-0.666667		7	6	1	1	-0.428571		3	5	7	0	0.266667
		12	4	0	0	-0.75		12	2	2	0	-0.625		15	1	0	0	-0.9375		1	4	11	0	0.625		4	6	4	0	0		10	2	3	0	-0.466667		7	5	4	0	-0.1875		0	7	7	0	0.5
		12	5	0	0	-0.705882		11	4	0	0	-0.733333		15	1	0	0	-0.9375		1	9	6	0	0.3125		11	4	1	0	-0.625		12	3	0	0	-0.8		9	4	1	0	-0.571429		1	5	8	0	0.5
		11	5	0	0	-0.6875		14	1	0	0	-0.933333		16	0	0	0	-1		0	3	11	0	0.785714		8	7	0	0	-0.533333		11	4	0	0	-0.733333		5	8	1	0	-0.285714		1	9	5	0	0.266667
		17	0	0	0	-1		13	2	0	0	-0.866667		14	0	0	0	-1		1	7	8	0	0.4375		11	3	1	0	-0.666667		5	9	2	0	-0.1875		8	5	3	0	-0.3125		4	5	7	0	0.1875
		12	4	0	0	-0.75		10	1	2	0	-0.615385		13	3	0	0	-0.8125		2	5	8	0	0.4		10	2	3	0	-0.466667		14	1	1	0	-0.8125		11	4	1	0	-0.625		3	10	3	0	0
		13	4	0	0	-0.764706		15	1	0	0	-0.9375		16	1	0	0	-0.941176		0	3	13	0	0.8125		9	6	1	0	-0.5		9	5	1	0	-0.533333		1	9	5	0	0.266667		2	6	6	0	0.285714
	Panel C
	Genotype	Cg > +						Cg > +						+ > Henna IR1						+ > Henna IR1						Cg > Henna IR1						Cg > Henna IR1
	Dietary treatment	holidic medium - neAAs						holidic medium - all AAs						holidic medium - neAAs						holidic medium - all AAs						holidic medium - neAAs						holidic medium - all AAs
	Option 1 in food choice assay	Sucrose						Sucrose						Sucrose						Sucrose						Sucrose						Sucrose
	Option 2 in food choice assay	Yeast						Yeast						Yeast						Yeast						Yeast						Yeast
		red	red/blue	blue	none	Yeast Preference Index		red	red/blue	blue	none	Yeast Preference Index		red	red/blue	blue	none	Yeast Preference Index		red	red/blue	blue	none	Yeast Preference Index		red	red/blue	blue	none	Yeast Preference Index		red	red/blue	blue	none	Yeast Preference Index
		7	6	3	0	-0.25		1	2	12	0	0.733333		9	6	1	0	-0.5		0	7	8	0	0.533333		1	3	11	0	0.666667		0	11	5	0	0.3125
		8	7	1	0	-0.4375		2	7	7	0	0.3125		5	8	3	0	-0.125		1	7	7	0	0.4		2	8	6	0	0.25		0	11	5	0	0.3125
		10	3	2	1	-0.533333		1	4	10	0	0.6		4	6	5	0	0.0666667		5	8	3	0	-0.125		2	6	8	0	0.375		1	6	9	0	0.5
		2	7	7	0	0.3125		0	2	12	0	0.857143		7	9	0	0	-0.4375		0	12	4	0	0.25		3	7	6	0	0.1875		0	11	4	0	0.266667
		3	11	1	1	-0.133333		1	4	7	0	0.5		4	6	6	0	0.125		4	8	3	1	-0.0666667		2	5	9	0	0.4375		0	8	8	0	0.5
		1	7	8	0	0.4375		1	9	6	0	0.3125		2	13	1	0	-0.0625		2	8	6	0	0.25		2	6	7	0	0.333333		1	3	12	0	0.6875
		10	4	2	0	-0.5		0	4	12	0	0.75		6	5	5	0	-0.0625		4	4	7	0	0.2		0	5	11	0	0.6875		0	6	10	0	0.625
		1	9	5	0	0.266667		2	5	9	0	0.4375		4	9	3	0	-0.0625		5	8	3	0	-0.125		1	5	10	0	0.5625		4	2	10	0	0.375
		1	8	7	0	0.375		4	3	7	0	0.214286		6	6	4	0	-0.125		0	11	5	0	0.3125		2	7	7	0	0.3125		0	5	10	0	0.666667
		2	8	5	0	0.2		1	6	8	0	0.466667		6	9	1	0	-0.3125		2	8	6	0	0.25		0	0	10	0	1		0	4	10	0	0.714286
		7	8	1	0	-0.375		0	5	10	0	0.666667		5	10	2	0	-0.176471		1	10	4	0	0.2		0	4	11	0	0.733333		0	4	11	0	0.733333
		5	7	4	0	-0.0625		2	6	6	0	0.285714		7	5	4	0	-0.1875		3	8	5	0	0.125		0	5	11	0	0.6875		3	4	9	0	0.375
		9	3	2	1	-0.5		0	9	7	0	0.4375		10	5	1	0	-0.5625		2	6	8	0	0.375		2	3	11	0	0.5625		2	3	11	0	0.5625
		5	5	6	0	0.0625		1	8	5	1	0.285714		3	11	2	0	-0.0625		1	6	9	0	0.5		0	4	11	0	0.733333		0	5	10	0	0.666667
		5	7	3	0	-0.133333		2	7	7	0	0.3125		5	9	2	0	-0.1875		0	12	4	0	0.25		2	5	9	0	0.4375		1	3	11	0	0.666667
		5	7	3	0	-0.133333		2	4	10	0	0.5		5	10	1	0	-0.25		2	8	6	0	0.25		3	2	11	0	0.5		1	5	10	0	0.5625
		4	7	3	1	-0.0714286		1	4	10	0	0.6		10	5	1	0	-0.5625		4	9	3	0	-0.0625		0	3	13	0	0.8125		2	8	6	0	0.25
		4	9	2	0	-0.133333		0	4	11	0	0.733333		11	4	1	0	-0.625		4	8	4	0	0		1	6	9	0	0.5		0	5	10	0	0.666667
		3	6	7	0	0.25		0	5	11	0	0.6875		6	6	2	0	-0.285714		1	9	6	0	0.3125		2	5	9	0	0.4375		0	9	7	0	0.4375
		4	10	2	0	-0.125		3	6	7	0	0.25		9	5	0	0	-0.642857		3	5	7	1	0.266667		1	3	11	0	0.666667		1	6	9	0	0.5
[truncated: 20 more columns]

## Sheet: Fig 4
	Panel B
	Bacterial treatment	untreated						untreated						5 bacteria						5 bacteria						inactivated 5 bacteria						inactivated 5 bacteria
	Dietary treatment	holidic medium						holidic medium - His						holidic medium						holidic medium - His						holidic medium						holidic medium - His
	Option 1 in food choice assay	Sucrose						Sucrose						Sucrose						Sucrose						Sucrose						Sucrose
	Option 2 in food choice assay	Yeast						Yeast						Yeast						Yeast						Yeast						Yeast
		red	red/blue	blue	none	Yeast Preference Index		red	red/blue	blue	none	Yeast Preference Index		red	red/blue	blue	none	Yeast Preference Index		red	red/blue	blue	none	Yeast Preference Index		red	red/blue	blue	none	Yeast Preference Index		red	red/blue	blue	none	Yeast Preference Index
		4	8	4	0	0		1	3	9	1	0.615385		6	4	4	0	-0.142857		10	5	0	0	-0.666667		1	6	8	0	0.466667		0	3	12	0	0.8
		5	6	4	0	-0.0666667		1	3	10	0	0.642857		1	4	5	0	0.4		11	3	1	0	-0.666667		0	7	8	0	0.533333		0	1	14	0	0.933333
		1	6	8	0	0.466667		3	0	11	0	0.571429		1	8	6	0	0.333333		2	5	4	0	0.181818		1	4	8	1	0.538462		0	3	9	0	0.75
		11	1	2	1	-0.642857		2	2	10	0	0.571429		6	7	0	0	-0.461538		2	7	3	1	0.0833333		1	3	11	0	0.666667		2	5	8	0	0.4
		0	5	8	0	0.615385		0	0	14	0	1		4	7	3	0	-0.0714286		5	8	2	0	-0.2		1	6	8	0	0.466667		2	2	10	0	0.571429
		4	6	5	0	0.0666667		1	4	11	0	0.625		5	6	2	0	-0.230769		7	5	0	0	-0.583333		4	4	7	0	0.2		0	2	12	0	0.857143
		2	5	9	0	0.4375		3	3	7	0	0.307692		5	7	3	0	-0.133333		4	4	4	0	0		4	5	4	0	0		1	1	10	0	0.75
		3	6	4	0	0.0769231		4	1	10	0	0.4		6	7	0	0	-0.461538		5	9	0	0	-0.357143		2	7	7	0	0.3125		2	9	5	0	0.1875
		2	1	10	0	0.615385		4	4	8	0	0.25		6	10	0	0	-0.375		3	3	7	0	0.307692		5	4	6	0	0.0666667		2	2	10	0	0.571429
		2	8	5	0	0.2		3	5	8	0	0.3125		6	7	0	0	-0.461538		8	4	2	0	-0.428571		3	4	5	0	0.166667		0	5	9	0	0.642857
		5	3	6	0	0.0714286		3	0	10	0	0.538462		9	5	0	1	-0.642857		5	9	0	0	-0.357143		4	3	6	2	0.153846		2	3	8	0	0.461538
		8	4	3	0	-0.333333		2	4	8	0	0.428571		7	7	0	0	-0.5		7	5	0	2	-0.583333		9	6	1	0	-0.5		0	5	8	2	0.615385
		7	5	3	0	-0.266667		4	5	6	1	0.133333		8	7	0	0	-0.533333		10	3	1	0	-0.642857		4	5	3	0	-0.0833333		1	8	7	0	0.375
		4	9	3	0	-0.0625		2	5	8	0	0.4		7	5	0	0	-0.583333		8	6	1	0	-0.466667		1	11	3	0	0.133333		3	5	7	0	0.266667
		5	7	3	0	-0.133333		5	2	7	2	0.142857		7	7	0	0	-0.5		10	4	0	0	-0.714286		3	4	9	0	0.375		0	6	8	0	0.571429
		7	4	4	0	-0.2		2	5	9	0	0.4375		7	7	1	0	-0.4		5	5	3	0	-0.153846		2	6	6	0	0.285714		2	1	12	0	0.666667
		5	4	6	0	0.0666667		1	5	9	0	0.533333		8	6	1	0	-0.466667		11	2	0	0	-0.846154		1	7	6	1	0.357143		0	1	13	0	0.928571
		5	5	0	0	-0.5		3	6	7	0	0.25		6	5	2	0	-0.307692		8	6	1	0	-0.466667		2	7	7	0	0.3125		1	5	8	0	0.5
		7	4	4	0	-0.2		5	5	6	0	0.0625		6	4	1	0	-0.454545		10	2	1	0	-0.692308		4	7	5	0	0.0625		2	4	9	0	0.466667
		4	7	4	0	0		5	2	9	0	0.25		11	2	1	0	-0.714286		3	7	4	0	0.0714286		3	5	7	0	0.266667		1	6	8	0	0.466667
		7	7	1	0	-0.4		1	5	9	0	0.533333		4	9	0	0	-0.307692		2	4	7	0	0.384615		9	3	3	1	-0.4		2	0	11	0	0.692308
		1	5	7	0	0.461538		2	3	10	0	0.533333		3	7	4	0	0.0714286		8	4	2	0	-0.428571		7	3	6	0	-0.0625		1	2	12	0	0.733333
		7	4	3	0	-0.285714		4	5	5	1	0.0714286		8	5	0	0	-0.615385		8	2	3	0	-0.384615		4	6	4	0	0		0	3	9	0	0.75
		2	5	7	0	0.357143		1	1	12	0	0.785714		3	10	2	0	-0.0666667		5	3	2	1	-0.3		3	7	4	0	0.0714286		7	4	5	0	-0.125
		2	10	2	0	0		7	4	4	0	-0.2		7	7	1	0	-0.4		9	4	0	1	-0.692308		6	8	1	1	-0.333333		2	4	8	0	0.428571
		7	5	4	0	-0.1875		0	5	10	0	0.666667		6	5	0	0	-0.545455		11	2	1	0	-0.714286		7	3	6	0	-0.0625		1	5	11	0	0.588235
		7	5	4	0	-0.1875		1	5	8	0	0.5		6	4	2	0	-0.333333		6	7	1	0	-0.357143		4	5	6	0	0.133333		1	4	9	0	0.571429
		2	5	8	0	0.4		4	1	9	0	0.357143		0	7	7	1	0.5		2	7	3	0	0.0833333		1	9	5	0	0.266667		4	1	9	0	0.357143
		3	1	10	0	0.5		0	3	11	0	0.785714		5	7	0	0	-0.416667		8	4	2	0	-0.428571		1	10	3	0	0.142857		0	5	9	0	0.642857
		2	4	6	0	0.333333		7	3	5	0	-0.133333		8	6	0	0	-0.571429		9	2	0	0	-0.818182		2	2	9	0	0.538462		1	6	8	0	0.466667
	Panel C
	Bacterial treatment	untreated						untreated						5 bacteria
	Dietary treatment	holidic medium						holidic medium - essential AAs						holidic medium - essential AAs
	Option 1 in food choice assay	Sucrose						Sucrose						Sucrose
	Option 2 in food choice assay	Yeast						Yeast						Yeast
		red	red/blue	blue	none	Yeast Preference Index		red	red/blue	blue	none	Yeast Preference Index		red	red/blue	blue	none	Yeast Preference Index
		6	8	2	0	-0.25		5	4	6	0	0.0666667		5	2	2	0	-0.333333
		6	4	4	0	-0.142857		6	3	6	0	0		9	3	2	0	-0.5
		4	7	4	0	0		4	4	5	0	0.0769231		11	2	2	0	-0.6
		4	6	5	0	0.0666667		4	4	7	0	0.2		13	2	1	0	-0.75
		4	3	6	1	0.153846		2	5	8	0	0.4		10	2	2	0	-0.571429
		4	5	4	1	0		1	2	10	0	0.692308		7	4	3	1	-0.285714
		1	5	6	0	0.416667		2	4	10	0	0.5		9	1	3	0	-0.461538
		6	5	5	0	-0.0625		1	4	7	1	0.5		11	3	0	0	-0.785714
		8	5	2	0	-0.4		0	3	10	2	0.769231		10	2	0	0	-0.833333
		3	5	4	0	0.0833333		0	5	10	1	0.666667		13	2	1	0	-0.75
		5	7	3	0	-0.133333		6	5	4	0	-0.133333		11	3	1	0	-0.666667
		7	6	2	0	-0.333333		0	5	8	0	0.615385		6	6	1	0	-0.384615
		5	7	2	1	-0.214286		3	1	11	0	0.533333		9	2	2	0	-0.538462
		3	3	6	1	0.25		4	2	7	0	0.230769		5	5	3	1	-0.153846
		9	3	1	0	-0.615385		3	5	7	0	0.266667		12	2	1	0	-0.733333
		7	5	3	0	-0.266667		3	4	8	0	0.333333		10	4	0	0	-0.714286
		5	7	3	0	-0.133333		3	5	3	2	0		12	1	0	0	-0.923077
		5	5	6	0	0.0625		2	2	11	0	0.6		13	2	1	0	-0.75
		8	6	1	0	-0.466667		2	5	9	0	0.4375		11	4	0	1	-0.733333
		9	3	3	1	-0.4		3	3	8	0	0.357143		12	3	1	0	-0.6875
	Panel D
	Bacterial treatment	0% bacteria						0% bacteria						20% bacteria						40% bacteria						60% bacteria						80% bacteria						100% bacteria
	Dietary treatment	holidic medium						holidic medium - His						holidic medium - His						holidic medium - His						holidic medium - His						holidic medium - His						holidic medium - His
	Option 1 in food choice assay	Sucrose						Sucrose						Sucrose						Sucrose						Sucrose						Sucrose						Sucrose
	Option 2 in food choice assay	Yeast						Yeast						Yeast						Yeast						Yeast						Yeast						Yeast
		red	red/blue	blue	none	Yeast Preference Index		red	red/blue	blue	none	Yeast Preference Index		red	red/blue	blue	none	Yeast Preference Index		red	red/blue	blue	none	Yeast Preference Index		red	red/blue	blue	none	Yeast Preference Index		red	red/blue	blue	none	Yeast Preference Index		red	red/blue	blue	none	Yeast Preference Index
		12	3	0	0	-0.8		3	6	6	0	0.2		6	6	2	0	-0.285714		8	5	2	0	-0.4		9	6	0	0	-0.6		7	8	1	0	-0.375		5	6	3	0	-0.142857
		9	5	1	0	-0.533333		2	4	10	0	0.5		10	5	0	0	-0.666667		11	3	2	0	-0.5625		8	6	1	0	-0.466667		8	6	1	0	-0.466667		6	7	2	0	-0.266667
		11	5	0	1	-0.6875		2	5	7	0	0.357143		4	5	4	0	0		6	6	4	0	-0.125		7	3	5	0	-0.133333		6	3	6	0	0		13	2	1	0	-0.75
		6	6	4	0	-0.125		0	8	7	0	0.466667		7	3	5	0	-0.133333		8	5	2	0	-0.4		9	4	3	0	-0.375		6	6	3	0	-0.2		9	4	2	0	-0.466667
		8	6	0	1	-0.571429		3	6	7	0	0.25		3	6	6	0	0.2		8	5	2	0	-0.4		14	1	0	0	-0.933333		8	4	3	0	-0.333333		12	3	0	0	-0.8
		8	4	3	0	-0.333333		6	5	5	0	-0.0625		9	5	1	0	-0.533333		6	3	4	0	-0.153846		6	5	3	0	-0.214286		2	5	8	0	0.4		6	7	3	0	-0.1875
		10	4	1	0	-0.6		0	8	6	0	0.428571		10	3	1	0	-0.642857		10	4	1	0	-0.6		10	4	1	0	-0.6		11	5	0	0	-0.6875		10	5	0	0	-0.666667
		13	1	0	0	-0.928571		3	4	10	0	0.411765		8	6	1	0	-0.466667		7	7	1	0	-0.4		9	3	3	0	-0.4		14	2	0	0	-0.875		10	6	0	0	-0.625
		14	3	0	0	-0.823529		5	6	3	0	-0.142857		6	4	2	0	-0.333333		9	5	2	0	-0.4375		5	7	1	0	-0.307692		15	1	0	0	-0.9375		7	5	3	0	-0.266667
		9	3	2	0	-0.5		7	7	2	0	-0.3125		10	5	0	0	-0.666667		2	10	4	0	0.125		9	6	1	0	-0.5		9	4	4	0	-0.294118		10	2	2	0	-0.571429
		8	7	1	0	-0.4375		5	7	2	0	-0.214286		12	3	0	0	-0.8		9	5	1	0	-0.533333		10	6	0	0	-0.625		13	2	0	0	-0.866667		10	4	0	0	-0.714286
		6	4	4	0	-0.142857		2	7	7	0	0.3125		9	6	1	0	-0.5		14	1	0	0	-0.933333		11	3	0	0	-0.785714		15	0	0	0	-1		7	7	2	0	-0.3125
		9	4	2	0	-0.466667		3	5	8	0	0.3125		9	4	2	0	-0.466667		7	8	1	0	-0.375		11	5	0	0	-0.6875		11	5	0	0	-0.6875		9	2	0	0	-0.818182
		7	5	1	0	-0.461538		1	7	5	0	0.307692		12	2	1	0	-0.733333		7	7	0	0	-0.5		15	0	0	0	-1		11	2	0	0	-0.846154		10	3	1	0	-0.642857
		9	7	0	0	-0.5625		6	5	4	0	-0.133333		11	3	1	0	-0.666667		7	4	4	0	-0.2		8	4	3	0	-0.333333		11	2	2	0	-0.6		9	2	2	0	-0.538462
	Panel E
	Genotype	tubulin > Henna R1						tubulin > Henna R1						tubulin > Henna R1
	Bacterial treatment	untreated						5 bacteria						untreated
	Dietary treatment	holidic medium - non-essential AAs						holidic medium - non-essential AAs						holidic medium - non-essential AAs + 2x Tyr
	Option 1 in food choice assay	Sucrose						Sucrose						Sucrose
	Option 2 in food choice assay	Yeast						Yeast						Yeast
		red	red/blue	blue	none	Yeast Preference Index		red	red/blue	blue	none	Yeast Preference Index		red	red/blue	blue	none	Yeast Preference Index
		1	6	7	0	0.428571		2	3	10	0	0.533333		7	7	2	0	-0.3125
		0	4	12	0	0.75		1	2	13	0	0.75		7	5	4	0	-0.1875
		0	4	12	0	0.75		0	5	11	0	0.6875		9	6	1	0	-0.5
		0	3	11	0	0.785714		1	5	9	0	0.533333		8	5	0	0	-0.615385
		0	5	11	0	0.6875		0	2	13	0	0.866667		11	1	3	0	-0.533333
		1	3	11	0	0.666667		0	1	15	0	0.9375		8	6	1	0	-0.466667
		0	3	13	0	0.8125		0	2	12	1	0.857143		1	7	8	0	0.4375
		0	5	9	0	0.642857		0	3	13	0	0.8125		7	7	2	0	-0.3125
		1	6	9	0	0.5		1	5	10	0	0.5625		4	6	4	0	0
		1	6	8	0	0.466667		2	6	8	0	0.375		4	7	3	0	-0.0714286
		1	3	12	0	0.6875		3	7	6	0	0.1875		4	8	3	0	-0.0666667
		3	7	6	0	0.1875		0	6	10	0	0.625		6	8	2	0	-0.25
		0	7	9	0	0.5625		3	3	10	0	0.4375		8	7	1	0	-0.4375
		0	4	11	0	0.733333		0	3	13	0	0.8125		7	7	2	0	-0.3125
		0	6	10	0	0.625		2	9	5	0	0.1875		12	2	2	0	-0.625
		1	2	13	0	0.75		0	3	13	0	0.8125		8	6	2	0	-0.375
		2	3	10	0	0.533333		0	5	10	0	0.666667		4	8	4	0	0
		4	4	8	0	0.25		1	6	9	0	0.5		4	7	5	0	0.0625
		2	2	12	0	0.625		0	4	12	0	0.75		7	9	0	0	-0.4375
		0	9	7	0	0.4375		0	9	7	0	0.4375		6	6	3	0	-0.2
		0	3	12	1	0.8		0	3	13	0	0.8125		5	7	4	0	-0.0625
		1	3	10	0	0.642857		1	7	8	0	0.4375		4	6	4	0	0
		2	6	7	0	0.333333		1	3	12	0	0.6875		4	4	7	0	0.2
		1	1	12	0	0.785714		1	4	10	0	0.6		4	6	5	0	0.0666667
		0	3	13	0	0.8125		0	1	14	1	0.933333		6	9	1	0	-0.3125
	Panel F
		number of eggs/female
	Bacterial treatment	untreated	5 bacteria	untreated	5 bacteria	untreated	5 bacteria	untreated	5 bacteria
	Dietary treatment	holidic medium	holidic medium	- His	- His	- Ile	- Ile	- Val	- Val
		32.3571	23.6875	16.7143	20.4667	12.5385	12.6875	6.86667	25.6
		25.3077	29.1429	12.8125	29.4375	13.75	17	8.73333	23.2857
		29.5	29.2143	9.66667	17.2	8.875	21.375	6.71429	19.0667
		23.9286	17.4615	16.5385	22.7143	7.71429	16.1875	9.92857	20.0667
		20.6	27.125	18.7333	22.7	5.1875	13.1333	10.25	20.5
		25.7333	24.6667	13.0667	14	7.8125	16.9412	8	22.5
		24.8125	23.8	23.8125	19.1538	12.25	14.5714	5.26667	26.625
		26	28.8667	8.73333	30.4615	11.5714	16.4286	9	21
		25.75	26.2143	10.5385	18.0714	9.33333	20.4	7	19.3333
		23.25	23.5	15.0667	15.3333	8.625	12.2	7.8125	19.75
		19.7143	21.6923	13.4375	14.6667	14.2667	17.3846	2.66667	15.0625
		21.875	27	12.7333	13.0667	9	19.7143	9.6875	19.0667
		18.125	22	13.1333	19.625	9.86667	18.0714	7.9375	21.1875
		25.2	29.1875	18.5714	18.8	6.8125	21	6.73333	13.1429
		24.875	25.125	16	18.7857	7.6	18.5625	5.1875	21.2143
		19	36	11.5	19	10.7333	15.3125	9.5625	16.6667
		24.9375	18.0714	18.4	23.8667	6.875	18.5	7.5	15.1429
		22.5	22.9286	18.8	20.1875	11.0833	19.2308	7.1875	20.8125
		23.7857	31.125	15.375	20.1429	5.14286	13.9286	5.53333	23.1333
		21.7333	25.0714	9.66667	12.7	8.66667	10	8.93333	21.5625
		30.6667	30.125	13.5714	25.6667	10.1875	26.3125	9.3125	9.90909
		30.8125	17.1429	14.0625	24.625	8.875	25.9333	9.4375	11.6667
		32.9375	29.5625	13.6875	26.4375	9.4375	17.125	11.25	8.66667
		30.6	32.75	12.125	19	10	23.2857	13.0667	17.25
		27	30.0667	18.6875	19.4375	7.0625	19.6875	8.875	11.2
		28.2667	40.625	15.1875	19	5.6	8.84615	12.6667	13.7692
		30.5	19.625	15.7857	19.5333	5.375	13.9231	8.5	8.26667
		23.9375	31	13.6	13.1667	9	22	6.46667	10.5
		30.6875	26.25	23.2667	16.25	8.25	14.3333	9.1875	15.125
		29.9375	33.6875	20.875	23.8235	4.71429	26.8667	11.875	11.2143
		28.8667	40.3125	16.5	11.0667	7.3125	14.5333	11.1333	14.6875
		26.9375	27.5	9.875	9	11.25	14.875	10.6	8.30769
		28.5	27.6	8.8125	22.9375	8.9375	13.8461	8.4375	11.2667
		25.5625	17.3571	17.1875	16.2143	7.4375	13.0667	5.6875	8.5
		23.7857	11.3333	15.7059	20.6	6.0625	12.2727	13.6875	10.8667
		29.8667	17.2667	14	12.0667	8.6	9.375	7.6875	6.28571
		29.6	33.1333	18.2667	16.8125	7.3125	11.8571	9.125	10.7333
		22.8125	29.625	13.3077	18.5	5.8125	12.8667	10.625	9.4
		27.5625	32.0625	21.0667	22.8125	7.25	24.5625	8.8125	8
		31.6	23.5	11.5			17.8667		7.06667

## Sheet: Fig 5
	Panel A
		number of sips on yeast
	Dietary treatment	holidic medium	holidic medium	holidic medium - His	holidic medium - His	holidic medium - Ile	holidic medium - Ile
	Bacterial treatment	untreated	5 bacteria	untreated	5 bacteria	untreated	5 bacteria
		2497	1689	6165	895	2949	3803
		884	1760	3693	1258	4086	23
		1848	1634	4318	3263	7071	578
		3179	1376	1895	3367	2739	5416
		2367	2156	3657	4633	5430	1539
		241	3999	4915	2026	6354	4724
		1303	1424	6241	3520	1911	5496
		2588	2687	2852	7573	5129	3788
		1747	2528	5958	3849	914	4794
		1174	2125	4099	4024	4700	284
		26	1882	5927	4329	6444	3987
		14	3336	3570	3092	5802	3596
		1423	2705	2936	3942	4336	3533
		1167	507	4357	1999	8656	5050
		3166	2432	7123	4016	7467	2970
		2319	2144	4118	2773	7039	5268
		2731	3278	4108	4724	9783	3767
		2913	21	6393	5329	4246	4851
		1925	1490	7378	7269	7413	425
		3029	15	9271	1915	6522	4469
		4425	1522	2481	2786	6199	5309
		3557	1282	4183	1376	5691	2220
		3391	1516	2131	519	6385	2033
		2165	1944	2699	2780	5899	7029
		1619	1545	5747	2138	3930	4421
		2465	1891	5516	3523	3139	499
		2268	1630	4285	2469	4317	2347
		943	495	3830	1948	4340	4738
		1474	3503	5474	3442	4476	1
		1578	885	771	2580	3008	1254
		3611	60	5475	1887	5523	3264
		4806	2050	5770	895	4975	5358
		2247	2946	2529	1076	5237	5232
		1304	1595	1782	2661	4309	4309
		1809	1414	4004	3037	4868	2126
		1571	691	4184	5118	832	2480
		857	2814	2680	4060	3432	3344
		432	1591	7031	2213	2242	1838
		2729	2290	10047	4265	2649	1952
		2407	1914	3089	5491	5863	4747
		3086	2320	3849	3577	1174	70
		5273	3294	3705	3230	3439	3409
		1	474	3674	6120	7446	6548
		4054	3520	7047	2052	2793	196
		549	2451	5140	4314	5967	3386
		128	3520	6017	4074	4325	7857
		1040	58	4501	3956	4759	2914
		2528	4178	5668	5653	3077	522
		1332	6	6698	3410	6649	19
		55	248	5161	5342	3893	4890
		57	2029	6203	5566	4160	3501
		1586	4786	3292	5811	5130	2720
		999	864	5983	3994	6427	2933
		4575	3230	5264	5907	4006	2296
		3008	3126	5840	1476	3026	461
		38	4154	4897	5484	3783	52
		1082	2003	5935	4181	4942	2972
		3319	3875	7242	7612	1853	6112
		1418	27	7744	4	6435	3797
		2018	4165	444	2774	4635	4990
		321	1939	3239	6111	5062	1958
		1812	15	10170	2861	891	4436
		2265	29	2608	1995	4938	1804
		33	1664	2799	3419	8464	2262
		763	47	6783	2037	5449	986
		121	2695	2632	3361	5563	3084
		17	7	6270	3570	5887	315
		86	6973	4202	2263	4075	2439
		1581	5397	4549	4579	2709	160
		767	2014	2447	1936	2184	11373
		2410	1115	4891	4037	5355	1235
		927	2998	6715	4666	3987	2247
		5352	3179	4032		7598	2976
		1804	2241	3301		2642	3908
		1463	2253	4413		5095	1308
		3081		4841		7491	35
		3592		4239		5339	5284
		1091		4216		3206	3554
		580				404
		23				6953
		7
		1354
	Panel B
		number of sips on sucrose
	Dietary treatment	holidic medium	holidic medium	holidic medium - His	holidic medium - His	holidic medium - Ile	holidic medium - Ile
	Bacterial treatment	untreated	5 bacteria	untreated	5 bacteria	untreated	5 bacteria
		206	202	232	53	102	121
		399	464	72	217	147	135
		62	217	159	235	44	235
		74	101	76	515	94	139
		206	172	212	127	164	114
		169	143	227	284	124	191
		127	88	214	266	135	44
		154	427	122	38	291	160
		75	185	67	113	3	361
		72	92	12	76	86	350
		14	51	53	229	229	314
		36	104	134	109	160	317
		74	97	224	111	83	112
		94	214	79	244	164	257
		154	336	413	35	203	40
		86	504	164	118	249	150
		230	129	169	57	159	209
		169	163	138	174	276	247
		9	200	52	142	75	105
		199	146	51	214	137	187
		106	330	84	132	88	522
		59	169	160	90	165	56
		178	319	85	119	214	482
		334	558	221	118	12	114
		49	324	105	103	68	120
		258	225	188	139	111	762
		163	275	136	132	110	421
		254	147	108	137	59	272
		92	153	68	134	466	62
		416	118	127	234	372	491
		101	222	166	1508	329	804
		168	107	165	103	83	268
		158	672	172	1606	115	642
		252	690	205	49	544	307
		143	649	89	105	77	1361
		256	339	236	247	588	52
		234	103	269	216	56	68
		236	1881	101	1685	158	16
		294	1963	53	600	62	68
		47	979	87	1270	294	59
		210	578	252	1012	228	58
		316	1168	73	1682	135	25
		125	447	415	724	170	476
		259	2260	67	639	249	114
		558	2441	84	680	121	215
		175	1639	124	826	1016	44
		28	277	109	1544	128	322
		721	1052	120	1798	941	539
		64	1461	357	240	447	722
		13	1840	138	985	389	1405
		41	1002	147	427	159	2
		66	583	159	1253	397	7
		156	499	79	1518	199	37
		124	591	145	1087	71	117
		82	168	195	936	127	697
		113	1007	364	421	330	67
		12	407	203	86	68	927
		282	1735	15	2096	176	438
		139	285	206	1376	414	116
		294	186	80	1407	370	688
		33	1019	493	1259	172	1343
		247	25	189	490	504	625
		48	47	19	568	18	706
		35	2671	12	1646	308	366
		77	1641	26	197	767	1382
		28	1637	455	1437	471	773
		37	732	146	880	257	1234
		257	1247	190	666	314	304
		131	392	243	569	363	792
		693	2089	74	1444	306	108
		69	1088	275		102	528
		169	2044	138		587	43
		249	337	76		208	163
		490	803	127		6	507
		335	311	46		496	750
		88		332		246	566
		80		206		536	471
		16		102		91	372
		39				350
		24				569
		11
		133
	Panel C
		number of sips on yeast
	Dietary treatment	holidic medium	holidic medium - His	holidic medium - His	holidic medium - His	holidic medium - His	holidic medium - His	holidic medium - His
	Bacterial treatment	untreated	untreated	5 bacteria	untreated	5 bacteria	untreated	5 bacteria
	[Sucrose]	50mM	50mM	50mM	100mM	100mM	200mM	200mM
		29	6275	2928	3857	1696	3740	3083
		1869	3349	3093	3038	1156	4419	3116
		3197	6555	4727	5824	4498	1872	2638
		525	5000	3147	3484	1	4294	3538
		2787	6444	2655	3545	2345	3136	972
		673	5226	2065	3630	4442	5192	2643
		1202	4901	2660	5438	4074	4092	1988
		1875	4411	2775	5860	4367	7031	2703
		1257	2237	895	4942	4219	4272	42
		3278	2314	2893	5559	4879	4395	3041
		3069	7095	1817	7444	3368	4015	1660
		3376	3657	1506	780	2153	3992	312
		2606	2292	3732	3289	3257	2746	3997
		2916	2784	2106	3343	2501	5001	2402
		1448	4725	3955	3390	2162	5086	3880
		2173	6467	2085	4227	2622	7535	3488
		2742	7894	2520	8156	5193	3490	2846
		926	4511	2447	5535	2837	2119	2518
		2683	4544	3662	7451	3028	4333	17
		2514	7197	3280	7967	3179	987	24
		275	5339	2429	3116	3239	5824	2068
		7084	1316	4511	6308	2574	7437	2303
		1126	4371	1427	2492	2541	5463	1618
		2736	1752	1853	3307	2918	4527	1539
		4909	1997	2138	1444	6139	6918	2635
		1835		725	958	2464	3440	1802
		2161		3948		529	6153	3354
		21		2134		2984	3719	1529
		39		3466		964	3004	2681
		13		3421		2167	985	3316
		537		24		2309	1386	837
				1471		315	2872	21
				764		1266	1725	18
				354		13	1705	7
				29		721	2105	278
						864
						1776
	Panel D
		number of sips on sucrose
	Dietary treatment	holidic medium	holidic medium - His	holidic medium - His	holidic medium - His	holidic medium - His	holidic medium - His	holidic medium - His
	Bacterial treatment	untreated	untreated	5 bacteria	untreated	5 bacteria	untreated	5 bacteria
	[Sucrose]	50mM	50mM	50mM	100mM	100mM	200mM	200mM
		1	190	237	322	236	66	305
		700	1	235	26	138	122	206
		465	215	117	176	137	10	197
		315	105	261	96	198	230	3
		210	40	222	81	131	106	58
		178	141	79	43	71	155	249
		122	88	186	39	114	90	36
		113	95	353	72	138	79	26
		317	63	1	252	57	119	25
		52	72	283	84	298	95	68
		107	199	149	238	69	41	32
		240	184	283	68	95	11	1
		126	93	486	158	46	53	30
		182	21	134	11	237	35	30
		72	477	176	144	37	103	54
		124	6	557	66	1	207	40
		62	83	60	108	79	141	74
		76	76	280	91	114	508	24
		216	95	165	98	90	52	16
		41	48	42	87	118	11	45
		255	124	167	254	447	139	7
		65	233	173	46	275	90	19
		72	240	85	306	129	89	9
		196	328	158	305	276	68	34
		170	305	135	143	126	95	114
		274		6	109	42	40	75
		72		225		87	98	71
		976		238		146	126	74
		697		67		120	248	62
		950		79		147	232	27
		487		219		79	159	49
				711		27	140	48
				125		81	177	68
				297		242	132	24
				348		178	270	58
						223
						222
	Panel E
	Dietary treatment	holidic medium - AAs	holidic medium - AAs
	Number of sips on	holidic AA medium	holidic AA medium with 5 bacteria
		41	38
		43	166
		137	215
		195	184
		36	115
		29	131
		9	188
		285	101
		130	56
		120	635
		105	181
		46	206
		189	116
		61	66
		114	928
		45	45
		515	80
		21	377
		60	50
		136	256
		12	61
		29	146
		226	343
		35	250
		16	140
		106	95
		377	268
		92	203
		77	166
		118	122
		112	139
		22	102
		520	175
		138	77
		171	199
		42	406
		345	786
		33
		78

## Sheet: Fig 6
	Panel A
		number of sips on yeast
	Dietary treatment	holidic medium	holidic medium - His	holidic medium - His	holidic medium - His	holidic medium - His	holidic medium - His	holidic medium - His	holidic medium - His	holidic medium - His	holidic medium - His	holidic medium - His	holidic medium - His	holidic medium - His	holidic medium - His
	Bacterial treatment	untreated	untreated	5 bacteria	5 bacteria - Ap	5 bacteria - Lp	5 bacteria - Lb	5 bacteria - Ci	5 bacteria - Ef	Ap	Lp	Lb	Ap+Lp	Ap+Lb	Lp+Lb
		1973	3699	5294	8424	2690	2706	1440	2449	3289	4715	6073	3239	2457	4427
		1976	5184	1409	3162	5404	2438	5268	2517	3919	5188	7858	5874	2146	5527
		1603	2015	868	2693	1474	1656	3954	3507	3829	5518	5052	3158	87	2644
		3332	2034	3491	1375	2088	45	2821	994	3043	3955	6235	1170	2120	5352
		1695	2321	7739	2064	2369	6715	5898	27	6673	4950	4627	4756	489	3863
		3066	21	29	3731	2175	331	630	5007	3925	4056	932	1086	2271	3578
		1294	3457	3673	594	3991	2177	2831	2679	1829	4359	4097	1529	57	1864
		1414	4112	3558	853	3405	1262	2440	3219	4067	5211	5297	743	2154	4809
		1321	2257	1883	4109	1911	326	4644	25	5307	5296	5026	50	1637	2063
		1138	5981	4535	199	3696	2504	2411	5277	3873	3043	5066	2869	3573	2822
		1771	4279	8	5085	3013	1519	7	1229	3953	1929	5290	3837	2892	6035
		2917	4251	5	2080	1315	2139	2450	2531	4410	6160	2305	2034	61	4844
		1654	3935	4268	2451	2737	2610	1794	560	4952	5573	2978	1993	1483	3895
		2942	2490	955	2533	1565	29	2964	685	3904	4487	4222	3090	3900	1495
		5313	6781	5066	969	2450	5551	2632	1162	4978	5008	8678	577	4749	1889
		3255	4168	1156	2421	4547	4936	5567	2418	3419	3917	3444	3744	136	3881
		969	4022	1526	4625	199	5115	164	3652	2479	3903	5940	913	2311	4768
		714	3813	282	3075	2825	755	2989	1706	2907	6114	4384	4660	3625	5305
		2018	5801	4654	5631	15	19	3180	3025	2133	6755	2924	2513	589	5471
		3587	393	3874	3859	8	5270	3074	956	429	2858	5998	2910	47	4155
		1177	2613	1673	1510	2787	41	3900	704	5482	2376	5613	2027	2313	1911
		1967	6632	10	2199	4275	2167	714	1557	1957	1788	1987	1643	2616	5349
		510	3844	51	2254	2107	948	29	3203	1	1883	363	2590	1627	2218
		1906	2546	8	3405	54	5290	10	406	1517	1854	168	2235	1542	445
		3251	3416	2827	1768	53	1213	3347	26	515	5418	6509	1592	424	3012
		2451	4929	1464	5193	608	65	3862	667	5340	2803	5019	1883	428	1947
		2289	4772	1249	4601	2978	4245	1523	5145	3983	24	2482	191	3135	4074
		2166	3809	5680	5962	3845	1849	3228	2195	4460	4861	5093	3263	3096	1934
		3208	5141	6187	4029	1138	171	3354	2403	4068	2477	7312	3721	1621	3142
		7679	2497	2972	4432	434	3861	1	177	7176	3471	1840	1038	2928	1776
		1273	3960	29	3209	317	399	47	2826	55	2505	5902	151	195	537
		3041	3158	1630	36	293	53	6161	2152	864	1491	6921	2175	1033	2410
		2724	2632	3327	3945	1082	1587	1924	2975	4870	6653	5302	108	41	2455
		3132	3520	1986	800	1059	975	1869	4018	2494	5970	4477	2692	1235	5095
		3656	3055	3886	3753	411	1195	2464	2862	91	5542	1760	1179	3050	4538
		3717	5287	3034	3325	1074	3807	2009	1210	2275	1888	1859	73	14	3182
		1099	5293	3365	1829	379	4621	792	1199	1294	26	383	4859	930	1
		2235	7413	4330	4413	3821	6574	1394	2107	45	188	322	5030	1237	3709
		4249	6047	3980	3324	1865	2471	2322	2679	3875	66	2469	6447	690	4351
		482	4268	4179	3318	17	53	4712	1924	51	89	2544	3546	2728	3901
		3817	4191	3087	4068	976	1100	2183	2906	1664	87	5459	682	2886	5096
		2211	4903	2409	2461	917	3628	4072	2159	2780	1033	73	5186	5510	1946
		2965	1700	3474	3852	2592	1824	2785	3537	3673	3689	2195	2270	2053	1224
		3220	1653	4466	4970	1706	2634	2457	1473	5516	2041	2100	2144	6456	4494
		1058	3582	2795	3230	2188	4094	3518	1320	6537	4821	2491	5287	5541	4522
		2370	4162	2441	3120	4516	2075	1668	905	5995	137	4230	459	5179	4353
		379	3664	2854	1848	1371	1341	43	717		181	7214	1586	4078	4483
		934	4777	2537	2878	4200	1586	3472	781		1275	7293	5548	5562	6968
		3531	4103	3533	2524	246	3487	1887	2618		3883	5290	2628	4093	3150
		2445	5278	2787	2952	447	1152	1869	365		2852		3142	4273	4858
		1614	5867	2945	3500	1670	5501	1208	5		3323		2781	1643	6311
		2082	4614	550	5117	2909	5737	2220	7095		6052		3210	3999	5874
		3320	5382	122	3072	1237	4124	2349	3411		2677		2152	1899	3997
		1337	5842	2762	4403	3716	4146	24	2310		5348		2415	171	5036
		3723	5729	7506	6964	129	2336	6139	1178				125	5123	5026
		3513	7124	7482	6831	1068	1225	1729	1101				1126	1491	4965
		3342	8265	3108	4110	3802	3669	3036	3113				1845	272	4468
		735	5232	2942	3340	1247	2805	843	4559				2891	451	2178
		2779	4217	27	3762	3250	4019	2268	3935				8	2094	2097
		3874	7378	89	5474	1756	46	206	19				661	608	367
		684	9	17	39	1349	4651	2241	1140				29	3130	1456
		3751	3534	5205	4184	912	1436	1872	5054				1094	3552	3453
		5753	4993	6225	5395	2593	15	19	858				54	3325	3192
		2944	6692	1786	3899	476	3138	49	507				21	474	630
		3615	8430	2266	2553	5299	45	97	586				741	1650	3958
		3698	5602	5005	4607	4266	3480	32	13				67	49	64
		2958	7356	4463	4393	4362	4908	33	806				2447	4779	192
		3114	6822	3320	4137	1833	3716	25	6544				279	20	2265
		2718	4224	943	3477	2177	1167	35	3656				5276	1638	3945
		3055	2161	3643	2658	16	1010	4645	4365				6085	1533	176
		2272	7590	2973	4641	32	4315	4238	5151				2991	50	3728
		2445	5919		3187	19	1649	2450	475				2889	214	6972
		1706	7749		16	5688	1345	1817	2447				9536	536	1674
		3328	4569		6349	4838	3612	1220	2130				3901	2094	5438
		3574	4897		2150	764		1982	1085				57	4827	6704
		2025	5876		2978	140		1579					25	4416	2176
		2549	5068		3999	4871							3244	5497	63
		1929	7331		6167	3904							15	2824	1982
		5842	4093		2979	1785							72	2298	1384
		1232	4246		5074	2404							495	1639	1864
		2199	4611		4387	2950							3784	40	1365
		1	5199		6870	3469							1124	98	4515
		46	224		3051								570	161	4503
		49	2287		5116								143	55	4119
		2136	8307		3375								57	1869	328
		36	2082		8514								447	5219	52
		455	4764		5322								34	2837	291
		1437	5679		5315								5760	81	22
		1073	5023		4327								3153	10	7499
		40	26										3329	16	5050
		26	5136											12	5963
		55	2694											5091	7392
		374	26											26
		4209	2067
		8	2913
		2386	2751
		1397	2281
		1348	273
		4291	1715
		5241	2974
		2449	6256
		56	1983
		1021	10710
		21	3385
		87	1752
		2551	1574
		68	2104
		1212	3769
		61	6340
		850	2913
		4014	4520
		4044	5123
		3500	6815
		2797	53
			3063
			54
			3418
			2680
			6518
			8380
	Panel B
		number of sips on sucrose
	Dietary treatment	holidic medium	holidic medium - His	holidic medium - His	holidic medium - His	holidic medium - His	holidic medium - His	holidic medium - His	holidic medium - His	holidic medium - His	holidic medium - His	holidic medium - His	holidic medium - His	holidic medium - His	holidic medium - His
	Bacterial Treatment	untreated	untreated	5 bacteria	5 bacteria - Ap	5 bacteria - Lp	5 bacteria - Lb	5 bacteria - Ci	5 bacteria - Ef	Ap	Lp	Lb	Ap+Lp	Ap+Lb	Lp+Lb
		76	67	155	243	438	598	1415	855	234	209	84	607	224	210
		139	99	804	123	428	577	810	1121	67	297	230	1250	144	28
		46	81	346	124	410	427	273	688	136	295	259	1130	61	35
		29	27	67	74	249	69	380	818	238	500	364	1179	23	105
		89	22	501	34	405	611	906	142	371	431	1	304	131	46
		244	53	635	4	60	1245	73	469	779	110	28	1759	107	120
		154	311	1149	583	464	940	1096	960	75	393	320	855	83	17
		69	161	2138	19	459	940	561	531	190	326	363	1177	594	278
		147	61	768	49	793	977	808	1119	45	91	406	272	453	10
		54	276	847	107	570	905	374	999	55	84	467	443	75	152
		76	667	519	80	7	722	483	2046	131	168	365	1689	75	123
		158	854	1445	477	134	1907	1279	1086	33	28	113	986	79	18
		95	265	1964	110	172	2208	810	992	121	53	89	2035	212	31
		179	15	674	221	381	861	1507	1806	280	99	147	397	19	304
		57	119	172	92	182	1395	1674	1440	269	178	390	377	64	35
		11	78	316	288	657	1442	800	2168	38	129	85	205	65	43
		44	129	200	150	365	812	2412	479	158	156	125	707	345	62
		145	201	381	113	522	1387	980	685	92	51	281	405	199	149
		232	44	544	53	153	1918	2038	1764	214	42	238	36	99	252
		96	23	138	213	436	708	1125	500	90	1	160	1125	72	130
		74	190	111	79	613	794	537	318	268	543	154	450	40	5
		173	66	316	57	150	2165	2071	1179	65	183	176	726	213	83
		26	92	1160	19	281	599	1539	1329	161	42	366	172	9	31
		107	17	295	60	923	484	2544	95	65	206	253	144	1007	6
		190	128	140	88	558	494	1208	562	68	183	53	274	426	67
		185	174	1129	30	199	1371	579	666	266	153	114	77	284	87
		271	15	604	141	87	1348	1018	1273	281	226	81	764	53	6
		250	561	59	170	195	629	408	522	345	182	566	484	191	194
		1	1	490	338	141	874	517	441	207	100	55	155	43	92
		87	14	783	108	334	1028	1071	589	245	57	1	270	54	41
		270	59	653	575	152	457	1240	1016	85	115	255	305	167	1
		208	107	135	295	82	1637	587	1425	57	50	283	1136	164	14
		271	125	210	376	65	687	1137	417	32	90	220	1610	1	228
		196	17	365	235	33	966	748	249	198	172	201	233	28	44
		456	118	195	376	260	113	133	484	89	265	69	266	380	120
		167	35	94	1	401	44	230	185	22	349	59	911	15	189
		129	232	258	100	235	238	208	233	236	54	230	432	36	116
		7	181	748	226	216	572	1	79	65	25	74	638	225	484
		81	612	1171	591	161	157	109	95	185	102	216	598	1117	293
		38	531	1437	681	31	899	43	420	109	77	327	187	158	257
		177	473	39	1101	104	193	450	816	234	122	142	620	28	203
		326	375	131	500	199	228	480	647	242	117	305	338	81	43
		651	58	121	142	642	166	323	109	446	27	53	658	466	33
		118	151	217	220	129	339	353	167	204	80	468	1413	83	633
		374	12	72	133	99	148	134	452	105	249	169	85	47	154
		408	130	425	348	331	230	106	77	223	246	319	514	253	113
		301	153	1152	140	262	276	17	10		94	72	539	58	306
		631	151	298	30	394	764	155	176		304	195	557	428	376
		157	232	101	143	243	457	415	949		154	234	250	248	15
		204	217	675	460	208	91	178	251		113		333	389	97
		48	244	548	239	126	821	761	107		201		336	369	27
		181	304	952	318	20	1167	894	1129		153		136	520	351
		48	1999	1130	250	147	1943	704	523		709		170	103	12
		57	238	258	143	97	1966	313	1013		112		607	391	179
		67	125	489	239	203	215	697	374				140	258	461
		78	123	533	492	106	556	1622	1127				39	103	102
		172	82	506	429	167	210	228	814				163	87	250
		214	600	1363	256	175	1011	584	335				170	364	419
		278	219	535	756	320	323	285	119				378	110	335
		186	42	137	548	607	544	5	48				590	169	342
		424	377	183	620	825	536	797	804				574	227	300
		216	231	77	269	463	36	183	1008				246	54	641
		201	183	123	128	227	72	439	1016				141	117	72
		17	62	500	249	312	28	382	322				520	52	172
		344	236	1056	344	171	764	1801	299				82	191	61
		111	372	880	187	224	994	22	9				37	101	562
		167	35	450	215	371	108	2	1193				60	275	29
		115	162	197	12	65	275	20	498				48	292	604
		257	22	74	230	226	451	12	196				293	277	117
		71	152	597	201	742	672	43	417				8	1619	52
		469	92	1431	549	24	625	136	133				464	387	137
		206	163		693	20	1061	137	48				28	98	240
		839	177		126	93	709	118	187				346	401	344
		50	644		168	405		65	272				156	73	296
		265	333		36	629		949	43				38	103	107
		110	234		115	149		666					487	116	114
		38	167		23	295							247	310	197
		203	459		420	291							32	288	53
		175	755		719	80							540	46	147
		86	335		443	13							35	15	57
		522	194		118	113							482	393	30
		29	386		211	41							1774	254	51
		131	4		117								44	35	178
		100	112		115								267	68	357
		258	14		98								48	652	172
		313	209		351								60	33	428
		62	282		254								162	1887	567
		1819	86		165								468	335	62
		1	21		244								111	57	389
		225	148										246	166	98
		108	786											513	672
		91	136											48	32
		393	250											34
		211	373
		45	164
		152	441
		325	70
		292	303
		221	179
		633	12
		61	250
		9	136
		30	172
		124	43
		318	41
		23	127
		213	515
		4	4
		89	123
		59	37
		108	402
		284	108
		321	64
		439	159
			57
			7
			437
			306
			78

## Sheet: Fig 7
	Panel A
		Histidine concentration (mean)									Isoleucine concentration (mean)									Valine concentration (mean)
	Bacterial Treatment	untreated	5 bacteria	untreated	5 bacteria	untreated	5 bacteria	untreated	5 bacteria		untreated	5 bacteria	untreated	5 bacteria	untreated	5 bacteria	untreated	5 bacteria		untreated	5 bacteria	untreated	5 bacteria	untreated	5 bacteria	untreated	5 bacteria
	Dietary treatment	holidic medium	holidic medium	- His	- His	- Ile	- Ile	- Val	- Val		holidic medium	holidic medium	- His	- His	- Ile	- Ile	- Val	- Val		holidic medium	holidic medium	- His	- His	- Ile	- Ile	- Val	- Val
		14.77	3.92	0.02	0.09	1.67	1.81	1.9575	2.06		1.47	1.75	1.15	1.8	0.23	0.29	1.16427	1.33		2.32	3.44	1.89	4	3.64	5.39	0.332647	0.36
		10.81	8.04	1.32	1.93	9.75	10.36	11.21	9.88		1.13	1.16	0.85	0.96	0.19	0.29	1.02	0.85		1.8	2.24	1.7	2.32	3.25	3.14	0.26	0.5
		9.73	8.02	2.45	1.92	8.77	10.52	9.97	11.55		1.21	0.91	1.57	1.2	0.16	0.24	1.25	1.52		3.32	2.54	2.87	2.35	4.77	2.09	0.27	0.76

## Sheet: S1 Fig
	Panel A
	Dietary treatment	holidic medium						holidic medium - AA						holidic medium						holidic medium - AA						holidic medium						holidic medium - AA						holidic medium						holidic medium - AA
	Option 1 in food choice assay	holidic sucrose medium						holidic sucrose medium						holidic sucrose medium						holidic sucrose medium						holidic sucrose medium						holidic sucrose medium						holidic sucrose medium						holidic sucrose medium
	Option 2 in food choice assay	holidic AA medium						holidic AA medium						holidic AA medium - AA						holidic AA medium - AA						holidic AA medium - cholesterol						holidic AA medium - cholesterol						holidic AA medium - buffer						holidic AA medium - buffer
		red	red/blue	blue	none	Nutrient Preference Index		red	red/blue	blue	none	Nutrient Preference Index		red	red/blue	blue	none	Nutrient Preference Index		red	red/blue	blue	none	Nutrient Preference Index		red	red/blue	blue	none	Nutrient Preference Index		red	red/blue	blue	none	Nutrient Preference Index		red	red/blue	blue	none	Nutrient Preference Index		red	red/blue	blue	none	Nutrient Preference Index
		11	0	0	4	-1		8	2	6	0	-0.125		14	1	0	0	-0.933333		15	0	0	0	-1		16	0	0	0	-1		3	5	7	0	0.266667		13	2	0	1	-0.866667		8	5	3	0	-0.3125
		16	0	0	0	-1		4	7	4	0	0		16	0	0	0	-1		15	1	0	0	-0.9375		15	1	0	0	-0.9375		2	3	10	0	0.533333		9	3	4	0	-0.3125		1	6	8	0	0.466667
		15	1	0	0	-0.9375		7	4	5	0	-0.125		15	0	0	0	-1		15	0	0	0	-1		14	2	0	0	-0.875		1	4	11	0	0.625		14	1	0	0	-0.933333		2	3	10	0	0.533333
		14	1	1	0	-0.8125		11	4	1	0	-0.625		13	2	0	0	-0.866667		14	1	0	0	-0.933333		12	3	0	0	-0.8		4	3	6	1	0.153846		16	0	0	0	-1		2	6	6	0	0.285714
		15	0	0	0	-1		2	8	4	1	0.142857		16	0	0	0	-1		16	0	0	0	-1		15	0	0	0	-1		1	5	9	0	0.533333		14	1	0	0	-0.933333		4	5	6	0	0.133333
		16	0	0	0	-1		7	4	4	0	-0.2		16	0	0	0	-1		16	0	0	0	-1		16	0	0	0	-1		4	7	6	0	0.117647		10	3	1	0	-0.642857		7	4	4	0	-0.2
		13	2	0	0	-0.866667		4	4	6	0	0.142857		14	0	0	0	-1		15	0	0	0	-1		15	1	0	0	-0.9375		2	7	7	0	0.3125		13	3	1	0	-0.705882		5	4	6	0	0.0666667
		16	0	0	0	-1		3	9	5	0	0.117647		16	0	0	0	-1		15	0	0	0	-1		15	1	0	0	-0.9375		5	4	6	1	0.0666667		14	2	0	0	-0.875		4	5	6	0	0.133333
		16	1	0	0	-0.941176		4	5	7	0	0.1875		14	0	0	0	-1		16	0	0	0	-1		14	1	0	0	-0.933333		2	4	10	0	0.5		12	2	1	0	-0.733333		9	4	3	0	-0.375
		13	2	0	0	-0.866667		6	7	4	0	-0.117647		16	0	0	0	-1		15	0	0	0	-1		15	1	0	0	-0.9375		5	6	3	0	-0.142857		13	1	0	0	-0.928571		8	6	2	0	-0.375
		15	0	0	0	-1		4	7	3	0	-0.0714286		16	0	0	0	-1		15	1	0	0	-0.9375		15	0	0	0	-1		5	6	5	0	0		8	5	1	0	-0.5		3	6	7	0	0.25
		14	0	0	0	-1		5	7	3	0	-0.133333		15	1	0	0	-0.9375		15	0	0	0	-1		14	0	0	0	-1		3	7	5	0	0.133333		15	0	0	0	-1		7	4	5	9	-0.125
	Panel B
	Dietary treatment	holidic medium						holidic medium - AA						holidic medium						holidic medium - AA						holidic medium						holidic medium - AA						holidic medium						holidic medium - AA
	Option 1 in food choice assay	holidic sucrose medium						holidic sucrose medium						holidic sucrose medium						holidic sucrose medium						holidic sucrose medium						holidic sucrose medium						holidic sucrose medium						holidic sucrose medium
	Option 2 in food choice assay	holidic AA medium						holidic AA medium						holidic AA medium - AA						holidic AA medium - AA						holidic AA medium - non essential AAs						holidic AA medium - non essential AAs						holidic AA medium - essential AAs						holidic AA medium - essential AAs
		red	red/blue	blue	none	AA Preference Index		red	red/blue	blue	none	AA Preference Index		red	red/blue	blue	none	AA Preference Index		red	red/blue	blue	none	AA Preference Index		red	red/blue	blue	none	AA Preference Index		red	red/blue	blue	none	AA Preference Index		red	red/blue	blue	none	AA Preference Index		red	red/blue	blue	none	AA Preference Index
		10	4	1	0	-0.6		2	6	8	0	0.375		3	4	2	6	-0.111111		9	3	3	1	-0.4		1	4	5	3	0.4		1	5	9	0	0.533333		11	4	0	0	-0.733333		1	4	11	0	0.625
		9	4	2	0	-0.466667		0	1	13	1	0.928571		10	2	1	0	-0.692308		13	0	0	0	-1		4	2	3	6	-0.111111		3	5	7	0	0.266667		8	8	0	0	-0.5		6	4	5	0	-0.0666667
		3	5	5	0	0.153846		2	4	9	0	0.466667		8	4	0	2	-0.666667		12	3	0	1	-0.8		12	2	0	0	-0.857143		1	3	9	1	0.615385		6	5	3	0	-0.214286		4	7	5	0	0.0625
		7	3	1	1	-0.545455		3	3	9	0	0.4		11	4	0	0	-0.733333		14	0	0	0	-1		6	2	2	0	-0.4		1	6	7	1	0.428571		9	5	2	0	-0.4375		0	5	9	1	0.642857
		7	8	1	0	-0.375		3	3	10	0	0.4375		12	1	2	0	-0.666667		8	4	0	4	-0.666667		4	7	4	0	0		1	1	9	1	0.727273		12	3	1	0	-0.6875		2	8	6	0	0.25
		1	5	9	0	0.533333		1	1	14	0	0.8125		14	2	0	0	-0.875		9	2	0	4	-0.818182		8	4	3	1	-0.333333		1	2	13	0	0.75		8	4	4	0	-0.25		8	4	3	0	-0.333333
		6	5	3	0	-0.214286		2	5	8	0	0.4		10	3	0	0	-0.769231		15	0	0	0	-1		10	3	3	0	-0.4375		5	2	6	0	0.0769231		12	4	0	0	-0.75		3	5	5	0	0.153846
		2	3	9	0	0.5		2	4	10	0	0.5		15	1	0	0	-0.9375		9	3	0	4	-0.75		6	4	4	1	-0.142857		2	2	7	0	0.454545		9	5	1	1	-0.533333		3	7	5	0	0.133333
		7	3	3	0	-0.307692		1	3	11	0	0.666667		15	0	0	0	-1		8	2	0	4	-0.8		6	7	2	0	-0.266667		0	1	14	1	0.933333		12	3	0	0	-0.8		4	4	8	0	0.25
		14	0	0	0	-1		1	1	13	0	0.8		5	2	2	4	-0.333333		10	1	1	2	-0.75		11	1	0	0	-0.916667		0	0	10	2	1		4	7	5	0	0.0625		2	1	6	1	0.444444
		9	2	1	0	-0.666667		0	3	10	0	0.769231		11	2	2	1	-0.6		8	3	0	3	-0.727273		10	2	1	1	-0.692308		0	2	12	1	0.857143		10	3	1	1	-0.642857		2	0	8	1	0.6
		9	2	1	0	-0.666667		0	2	11	1	0.846154		13	2	0	1	-0.866667		13	0	0	1	-1		10	4	2	0	-0.5		0	1	15	0	0.9375		9	4	0	0	-0.692308		3	7	5	0	0.133333
		3	3	4	0	0.1		3	3	9	0	0.4		14	1	0	0	-0.933333		16	0	0	0	-1		1	6	7	0	0.428571		3	10	3	0	0		4	4	5	2	0.0769231		1	7	7	0	0.4
		8	6	0	0	-0.571429		1	4	10	0	0.6		15	0	0	0	-1		10	3	3	0	-0.4375		3	9	3	0	0		1	5	10	0	0.5625		9	3	2	0	-0.5		2	3	10	0	0.533333
		10	1	0	0	-0.909091		3	3	9	0	0.4		11	2	0	1	-0.846154		14	1	0	1	-0.933333		7	6	3	0	-0.25		3	3	9	1	0.4		10	5	1	0	-0.5625		2	4	9	1	0.466667
[truncated: 40 more columns]

## Sheet: S2 Fig
	Panel A
		tubulin > +			+>Henna IR1			tubulin>Henna IR1
		Mean	SEM		Mean	SEM		Mean	SEM
	RT PCR	0.37125	0.0235		1	0.10883		0.09246	0.04031
	Panel B
	Genotype	tubulin > Henna IR1						tubulin > Henna IR1						tubulin > Henna IR1						tubulin > Henna IR2						tubulin > Henna IR2						tubulin > Henna IR2						tubulin > Henna IR3						tubulin > Henna IR3
	Dietary treatment	holidic medium - neAAs						holidic medium - neAAs + 1x Tyr						holidic medium - neAAs + 1x Pro						holidic medium - neAAs						holidic medium - neAAs + 1x Tyr						holidic medium - neAAs + 1x Pro						holidic medium - neAAs						holidic medium - neAAs + 1x Tyr
	Option 1 in food choice assay	Sucrose						Sucrose						Sucrose						Sucrose						Sucrose						Sucrose						Sucrose						Sucrose
	Option 2 in food choice assay	Yeast						Yeast						Yeast						Yeast						Yeast						Yeast						Yeast						Yeast
		red	red/blue	blue	none	Yeast Preference Index		red	red/blue	blue	none	Yeast Preference Index		red	red/blue	blue	none	Yeast Preference Index		red	red/blue	blue	none	Yeast Preference Index		red	red/blue	blue	none	Yeast Preference Index		red	red/blue	blue	none	Yeast Preference Index		red	red/blue	blue	none	Yeast Preference Index		red	red/blue	blue	none	Yeast Preference Index
		1	1	14	0	0.8125		2	7	7	0	0.3125		0	1	15	0	0.9375		0	0	12	1	1		0	3	12	0	0.8		0	2	13	0	0.866667		0	0	15	1	1		0	7	8	0	0.533333
		0	0	16	0	1		2	5	8	0	0.4		0	0	16	0	1		0	1	14	0	0.933333		0	5	7	0	0.583333		0	1	14	0	0.933333		0	0	16	0	1		0	8	7	0	0.466667
		0	1	14	0	0.933333		1	6	9	0	0.5		0	0	16	0	1		0	0	13	0	1		0	1	10	0	0.909091		0	0	14	0	1		0	0	16	0	1		0	5	10	0	0.666667
		0	1	15	0	0.9375		0	9	7	0	0.4375		0	2	13	0	0.866667		0	0	14	0	1		0	7	8	0	0.533333		0	0	16	0	1		0	0	16	0	1		0	6	9	0	0.6
		0	0	16	0	1		2	7	7	0	0.3125		0	1	14	0	0.933333		0	0	14	1	1		0	2	10	0	0.833333		0	0	16	0	1		0	0	15	0	1		0	5	9	0	0.642857
		0	1	13	1	0.928571		2	11	3	0	0.0625		0	0	13	0	1		1	2	11	0	0.714286		0	5	9	0	0.642857		0	0	13	0	1		1	2	13	0	0.75		3	2	10	0	0.466667
		0	4	12	0	0.75		0	10	6	0	0.375		0	2	14	0	0.875		0	1	14	0	0.933333		1	1	10	1	0.75		0	0	14	2	1		0	2	12	1	0.857143		1	7	8	0	0.4375
		0	2	14	0	0.875		3	9	4	0	0.0625		0	5	11	0	0.6875		0	0	14	0	1		0	5	9	0	0.642857		0	0	13	2	1		0	1	14	1	0.933333		1	7	5	1	0.307692
		0	4	12	0	0.75		1	10	5	0	0.25		0	2	13	0	0.866667		0	1	11	2	0.916667		0	3	13	0	0.8125		0	1	11	0	0.916667		0	0	16	0	1		1	8	7	0	0.375
		1	1	14	0	0.8125		3	11	2	0	-0.0625		0	2	14	0	0.875		0	1	12	0	0.923077		0	7	8	0	0.533333		0	1	17	0	0.944444		1	2	12	0	0.733333		3	7	6	0	0.1875
	Panel C
	Genotype	+ > Henna IR1						+ > Henna IR1						Cg > +						Cg > +						Cg > Henna IR1						Cg > Henna IR1						elav> +						elav> +
	Dietary treatment	holidic medium - neAAs						holidic medium - all AAs						holidic medium - neAAs						holidic medium - all AAs						holidic medium - neAAs						holidic medium - all AAs						holidic medium - neAAs						holidic medium - all AAs
	Option 1 in food choice assay	Sucrose						Sucrose						Sucrose						Sucrose						Sucrose						Sucrose						Sucrose						Sucrose
	Option 2 in food choice assay	Yeast						Yeast						Yeast						Yeast						Yeast						Yeast						Yeast						Yeast
		red	red/blue	blue	none	Yeast Preference Index		red	red/blue	blue	none	Yeast Preference Index		red	red/blue	blue	none	Yeast Preference Index		red	red/blue	blue	none	Yeast Preference Index		red	red/blue	blue	none	Yeast Preference Index		red	red/blue	blue	none	Yeast Preference Index		red	red/blue	blue	none	Yeast Preference Index		red	red/blue	blue	none	Yeast Preference Index
		7	7	1	1	-0.4		2	11	4	0	0.117647		12	3	0	0	-0.8		2	13	1	0	-0.0625		4	11	1	0	-0.1875		4	12	0	0	-0.25		3	6	5	0	0.142857		0	13	3	0	0.1875
		3	11	1	0	-0.133333		1	13	0	0	-0.0714286		4	6	3	1	-0.0769231		1	11	3	0	0.133333		3	12	1	0	-0.125		0	10	5	0	0.333333		0	10	2	0	0.166667		1	10	1	0	0
		6	10	0	1	-0.375		3	11	1		-0.133333		11	3	0	0	-0.785714		4	9	3	0	-0.0625		6	10	0	0	-0.375		2	11	3	0	0.0625		1	11	3	0	0.133333		1	14	0	0	-0.0666667
		9	6	0	0	-0.6		2	14	4	0	0.1		10	3	1	1	-0.642857		2	11	3	0	0.0625		5	7	3	0	-0.133333		0	9	6	0	0.4		9	3	0	0	-0.75		1	5	7	0	0.461538
		12	3	0	0	-0.8		6	9	0	1	-0.4		13	2	0	0	-0.866667		3	7	4	0	0.0714286		0	14	1	1	0.0666667		0	13	1	1	0.0714286		3	6	1	0	-0.2		0	6	8	1	0.571429
		9	5	1	1	-0.533333		5	8	3	0	-0.125		11	5	0	0	-0.6875		2	11	2	0	0		10	6	0	0	-0.625		2	12	0	1	-0.142857		3	7	4	0	0.0714286		1	3	9	0	0.615385
		10	5	1	1	-0.5625		1	9	6	0	0.3125		9	3	1	0	-0.615385		11	4	0	0	-0.733333		4	4	7	1	0.2		0	14	2	0	0.125		2	8	4	0	0.142857		0	6	8	1	0.571429
		9	6	0	1	-0.6		0	7	7	1	0.5		13	2	0	0	-0.866667		3	8	2	0	-0.0769231		6	9	0	0	-0.4		0	14	1	0	0.0666667		11	5	0	0	-0.6875		3	8	4	0	0.0666667
		12	2	2	0	-0.625		2	9	5	0	0.1875		8	3	3	1	-0.357143		5	9	2	0	-0.1875		2	7	7	0	0.3125		4	10	1	1	-0.2		9	5	0	0	-0.642857		0	6	6	1	0.5
		7	7	1	0	-0.4		0	14	3	0	0.176471		11	3	1	0	-0.666667		6	9	1	0	-0.3125		5	8	6	0	0.0526316		0	11	5	0	0.3125		0	3	9	1	0.75		0	7	5	0	0.416667
		11	4	0	0	-0.733333		2	10	2	0	0		12	2	1	1	-0.733333		3	10	1	0	-0.142857		7	7	0	1	-0.5		1	13	2	0	0.0625		11	4	0	0	-0.733333		0	15	0	0	0
		10	7	0	0	-0.588235		3	10	0	1	-0.230769		10	5	0	1	-0.666667		10	5	0	0	-0.666667		2	14	0	0	-0.125		9	7	0	0	-0.5625		13	1	0	0	-0.928571		0	10	6	0	0.375
		6	9	0	0	-0.4		3	13	1	0	-0.117647		14	2	0	0	-0.875		2	7	7	0	0.3125		4	12	0	0	-0.25		0	11	3	0	0.214286		9	4	1	0	-0.571429		0	14	2	0	0.125
		10	5	1	0	-0.5625		3	10	2	1	-0.0666667		8	4	1	1	-0.538462		7	8	0	0	-0.466667		3	6	6	0	0.2		4	12	0	0	-0.25		5	10	1	0	-0.25		0	6	4	0	0.4
		7	5	1	1	-0.461538		7	3	5	1	-0.133333		11	3	0	0	-0.785714								3	7	5	0	0.133333		6	2	7	0	0.0666667		4	6	2	0	-0.166667		0	6	8	1	0.571429
		12	2	0	1	-0.857143		6	7	3	0	-0.1875														7	6	3	0	-0.25		4	11	0	1	-0.266667		9	5	0	0	-0.642857		2	9	3	0	0.0714286
		9	7	0	1	-0.5625		6	7	2	0	-0.266667														4	9	2	0	-0.133333		4	7	1	3	-0.25		6	3	2	0	-0.363636		1	13	0	0	-0.0714286
		9	4	2		-0.466667		4	11	0	0	-0.266667														0	11	4	0	0.266667		1	9	5	0	0.266667		3	9	3	1	0		2	6	4	2	0.166667
		12	4	0	0	-0.75		6	6	1	2	-0.384615														7	8	1	0	-0.375		7	6	3	0	-0.25		8	5	0	1	-0.615385		2	9	4	0	0.133333
		9	7	0	0	-0.5625		3	11	1	0	-0.133333																																2	6	7	0	0.333333
[truncated: 30 more columns]

## Sheet: S3 Fig
	Panel A
	Growth medium for	E. faecalis				E. faecalis
	Dietary treatment	holidic medium-His				holidic medium-His
	Bacterial treatment	untreated				5 bacteria
		Number of colonies	CFU/ml	CFU/fly		Number of colonies	CFU/ml	CFU/fly
		0	0	0		213	426000	21300
		0	0	0		212	424000	21200
		0	0	0		180	360000	18000
		0	0	0		1236	2472000	123600
		0	0	0		1090	2180000	109000
		0	0	0		950	1900000	95000
	Panel B
	Growth medium for	A. pomorum and C. intestini				A. pomorum and C. intestini
	Dietary treatment	holidic medium-His				holidic medium-His
	Bacterial treatment	untreated				5 bacteria
		Number of colonies	CFU/ml	CFU/fly		Number of colonies	CFU/ml	CFU/fly
		0	0	0		226	452000	22600
		0	0	0		268	536000	26800
		0	0	0		225	450000	22500
		0	0	0		955	1910000	95500
		0	0	0		1052	2104000	105200
		0	0	0		1423	2846000	142300
	Panel C
	Growth medium for	Lactobacilli				Lactobacilli
	Dietary treatment	holidic medium-His				holidic medium-His
	Bacterial treatment	untreated				5 bacteria
		Number of colonies	CFU/ml	CFU/fly		Number of colonies	CFU/ml	CFU/fly
		33	66000	3300		1755	3510000	175500
		68	136000	6800		944	1888000	94400
		109	218000	10900		1114	2228000	111400
		142	284000	14200		476	952000	47600
		0	0	0		41	82000	4100
		8	16000	800		119	238000	11900

[truncated: 4 more sheets: S4 Fig, S5 Fig, S6 Fig, S7 Fig]
